# Supplementary material for: Behavioral appraisal by implementing a short sequence of stress resolves adaptively changed stress gains
Source: Research Square preprint supplement (doi:10.21203/rs.3.rs-90131/v1), 2020-10-20
Supplement: Supplementary file 1 [file 28d14cc0b57494387b460fb7.docx]

**Supplementary Table 3.** A list of the 722 genes that were upregulated or downregulated >1.2-fold in the PL after RS5 treatment in CRST mice.

| Probe  Set ID | RefSeq  Transcript ID | Gene  Symbol | Gene function | Fold change of CON vs. CRST | Fold change of CRST vs. CRST+RS5 |
| --- | --- | --- | --- | --- | --- |
| ILMN_2936105 | NM_001013607.1 | Vmo1 | vitelline membrane outer layer 1 homolog (chicken) | -1.0489 | **4.9370** |
| ILMN_2781850 | NM_001034875.2 | Bpifb4 | BPI fold containing family B, member 4 | -0.0208 | **4.5205** |
| ILMN_2635197 | NM_175249.3 | Psapl1 | prosaposin-like 1 | 1.1056 | **4.0533** |
| ILMN_2690657 | NM_199303.1 | Bpil3 | bactericidal/permeability-increasing protein-like 3 | -1.0495 | **4.0454** |
| ILMN_1232884 | NM_011451.2 | Sphk1 | sphingosine kinase 1 | -1.2824 | **3.9293** |
| ILMN_2625893 | NM_053200.2 | Ces3 | carboxylesterase 3 | -1.1392 | **3.5785** |
| ILMN_2702903 | NM_007817.2 | Cyp2f2 | cytochrome P450, family 2, subfamily f, polypeptide 2 | -1.0951 | **3.4031** |
| ILMN_3159131 | NM_007812.2 | Cyp2a5 | cytochrome P450, family 2, subfamily a, polypeptide 5 | -0.6037 | **3.1946** |
| ILMN_2827072 | NM_172892.1 | Slc13a4 | solute carrier family 13 (sodium/sulfate symporters), member 4 | -1.3807 | **3.0022** |
| ILMN_1236758 | NM_026323.2 | Wfdc2 | WAP four-disulfide core domain 2 | -1.0570 | **2.9813** |
| ILMN_1248316 | NM_008963.1 | Ptgds | prostaglandin D2 synthase (brain) | -1.5224 | **2.9639** |
| ILMN_2793495 | NM_001024148.1 | Ugt2a2 | UDP glucuronosyltransferase 2 family, polypeptide A2 | -1.1588 | **2.6722** |
| ILMN_2749169 | NM_011312.2 | S100a5 | S100 calcium binding protein A5 | -1.4034 | **2.5856** |
| ILMN_2815651 | NM_183143.1 | BC048679 | cDNA sequence BC048679 | -1.0152 | **2.5081** |
| ILMN_2687872 | NM_007742.2 | Col1a1 | collagen, type I, alpha 1 | -1.3175 | **2.4526** |
| ILMN_2666018 | NM_008597.3 | Mgp | matrix Gla protein | -1.3150 | **2.4321** |
| ILMN_2756665 | NM_007621.1 | Cbr2 | carbonyl reductase 2 | -1.0528 | **2.3449** |
| ILMN_2708491 | NM_008766.2 | Slc22a6 | solute carrier family 22 (organic anion transporter), member 6 | -1.2507 | **2.3301** |
| ILMN_2846120 | NM_007814.1 | Cyp2b19 | cytochrome P450, family 2, subfamily b, polypeptide 19 | 1.0749 | **2.2796** |
| ILMN_2597769 | NM_010514.2 | Igf2 | insulin-like growth factor 2 | -1.3438 | **2.2442** |
| ILMN_2873822 | NM_009636.1 | Aebp1 | AE binding protein 1 | -1.2382 | **2.1741** |
| ILMN_2849016 | NM_026183.2 | Slc47a1 | solute carrier family 47, member 1 | -1.1859 | **2.1716** |
| ILMN_2959757 | NM_013809.1 | Cyp2g1 | cytochrome P450, family 2, subfamily g, polypeptide 1 | -1.1402 | **2.1542** |
| ILMN_2859613 | NM_008760.2 | Ogn | osteoglycin | -1.2556 | **2.1163** |
| ILMN_2803249 | NM_009349.1 | Inmt | indolethylamine N-methyltransferase | 1.0047 | **2.0993** |
| ILMN_2850077 | NM_007409.2 | Adh1 | alcohol dehydrogenase 1 (class I) | 1.0312 | **2.0559** |
| ILMN_2944508 | NM_001032298.2 | Bglap2 | bone gamma-carboxyglutamate protein 2 | 1.0322 | **2.0539** |
| ILMN_2930203 | NM_201641.1 | Ugt1a10 | UDP glycosyltransferase 1 family, polypeptide A10 | 1.0467 | **2.0140** |
| ILMN_2747959 | NM_007833.4 | Dcn | decorin | -1.1881 | **1.9831** |
| ILMN_2913166 | NM_009776.1 | Serping1 | serine (or cysteine) peptidase inhibitor, clade G, member 1 | -1.2547 | **1.9639** |
| ILMN_1259174 | NM_009132.1 | Scin | scinderin | 1.0201 | **1.9227** |
| ILMN_2980815 | NM_130878.2 | Pcdh21 | cadherin-related family member 1 | -1.5224 | **1.9094** |
| ILMN_2599794 | NM_007469.3 | Apoc1 | apolipoprotein C-I | -1.0227 | **1.8994** |
| ILMN_2964042 | NM_007542.3 | Bgn | biglycan | -1.1974 | **1.8766** |
| ILMN_2652757 | NM_134255.2 | Elovl5 | ELOVL family member 5, elongation of long chain fatty acids | -1.0543 | **1.8639** |
| ILMN_1221817 | NM_001042605.1 | Cd74 | CD74 antigen (invariant polypeptide of major histocompatibility complex, class II antigen-associated) | -1.1754 | **1.8611** |
| ILMN_2624854 | NM_008183.3 | Gstm2 | glutathione S-transferase, mu 2 | -1.1093 | **1.8421** |
| ILMN_2737685 | NM_008607.1 | Mmp13 | matrix metallopeptidase 13 | -1.0057 | **1.8228** |
| ILMN_1212645 | NM_144512.2 | Slc6a13 | solute carrier family 6 (neurotransmitter transporter, GABA), member 13 | -1.3261 | **1.8033** |
| ILMN_1233122 | NM_031368.3 | Bglap3 | bone gamma-carboxyglutamate protein 3 | -1.0778 | **1.8024** |
| ILMN_1256423 | NM_198024.1 | Ranbp3l | RAN binding protein 3-like | -1.2053 | **1.7819** |
| ILMN_2639239 | NM_011340.3 | Serpinf1 | serine (or cysteine) peptidase inhibitor, clade F, member 1 | -1.1460 | **1.7724** |
| ILMN_2676379 | NM_011134.2 | Pon1 | paraoxonase 1 | 1.0191 | **1.7585** |
| ILMN_2612895 | NM_013484.1 | C2 | complement component 2 (within H-2S) | -1.0479 | **1.7577** |
| ILMN_2607675 | XM_918601.3 | LOC641240 | h-2 class II histocompatibility antigen, A-U beta chain-like | -1.1514 | **1.7556** |
| ILMN_2727520 | NM_007751.2 | Cox8b | cytochrome c oxidase subunit VIIIb | 1.0430 | **1.7384** |
| ILMN_2595593 | NM_008557.1 | Fxyd3 | FXYD domain-containing ion transport regulator 3 | 1.0246 | **1.7051** |
| ILMN_2654377 | NM_194357.1 | Rya3 | BPI fold containing family B, member 3 | 1.0076 | **1.6984** |
| ILMN_2657175 | NM_007585.3 | Anxa2 | annexin A2 | -1.1527 | **1.6977** |
| ILMN_2883392 | NM_016740.3 | S100a11 | S100 calcium binding protein A11 | -1.1987 | **1.6960** |
| ILMN_1225423 | NM_177822.3 | Mslnl | mesothelin-like | -1.2023 | **1.6898** |
| ILMN_2999762 | NM_021355.2 | Fmod | fibromodulin | -1.1969 | **1.6801** |
| ILMN_2742042 | NM_019738.1 | Nupr1 | nuclear protein transcription regulator 1 | -1.1398 | **1.6799** |
| ILMN_2894396 | NM_144914.2 | Tmem184a | transmembrane protein 184a | -1.0633 | **1.6792** |
| ILMN_2635387 | XM_001477283.1 | LOC100047046 | monoacylglycerol O-acyltransferase 1 | -1.0318 | **1.6775** |
| ILMN_2693895 | NM_007392.2 | Acta2 | actin, alpha 2, smooth muscle, aorta | -1.1875 | **1.6749** |
| ILMN_2838308 | NM_010231.2 | Fmo1 | flavin containing monooxygenase 1 | -1.1010 | **1.6713** |
| ILMN_2833163 | NM_173375.1 | Fam180a | family with sequence similarity 180, member A | -1.2179 | **1.6391** |
| ILMN_2932705 | NM_010865.2 | Myoc | myocilin | -1.1792 | **1.6377** |
| ILMN_2940195 | NM_019946.3 | Mgst1 | microsomal glutathione S-transferase 1 | -1.0698 | **1.6362** |
| ILMN_1231143 | NM_178412.2 | Chil6 | chitinase-like 6 | -1.0364 | **1.6341** |
| ILMN_2729103 | NM_175643.2 | Adamts2 | a disintegrin-like and metallopeptidase (reprolysin type) with thrombospondin type 1 motif, 2 | -1.0741 | **1.6339** |
| ILMN_1215252 | NM_007554.2 | Bmp4 | bone morphogenetic protein 4 | -1.1167 | **1.6285** |
| ILMN_2792028 | NM_145451.1 | Gpx6 | glutathione peroxidase 6 | -1.2330 | **1.6249** |
| ILMN_1237375 | NM_009127.3 | Scd1 | stearoyl-Coenzyme A desaturase 1 | 1.1667 | **1.6211** |
| ILMN_2810882 | NM_008908.1 | Ppic | peptidylprolyl isomerase C | -1.1753 | **1.6173** |
| ILMN_2671165 | NM_033373.1 | Krt23 | keratin 23 | 1.0565 | **1.6078** |
| ILMN_2827729 | NM_007586.1 | Calb2 | calbindin 2 | -1.2777 | **1.6050** |
| ILMN_2724942 | NM_008968.3 | Ptgis | prostaglandin I2 (prostacyclin) synthase | -1.0763 | **1.6048** |
| ILMN_2837080 | NM_013478.1 | Azgp1 | alpha-2-glycoprotein 1, zinc | -1.0310 | **1.6036** |
| ILMN_2918312 | NM_054055.1 | Slc13a3 | solute carrier family 13 (sodium-dependent dicarboxylate transporter), member 3 | -1.1243 | **1.6026** |
| ILMN_2640097 | NM_023617.2 | Aox3 | aldehyde oxidase 3 | -1.1130 | **1.5949** |
| ILMN_2878071 | NM_013590.2 | Lyz | lysozyme | -1.1542 | **1.5923** |
| ILMN_1256644 | NM_133661.3 | Slc6a12 | solute carrier family 6 member 12, Betaine transporter | -1.1267 | **1.5914** |
| ILMN_1226525 | NM_207105.2 | H2-Ab1 | histocompatibility 2, class II antigen A, beta 1 | -1.1888 | **1.5808** |
| ILMN_2999627 | NM_008125.2 | Gjb2 | gap junction protein, beta 2 | -1.1284 | **1.5780** |
| ILMN_2610166 | NM_001037939.1 | Bglap1 | bone gamma carboxyglutamate protein | -1.0654 | **1.5651** |
| ILMN_2671473 | NM_207233.1 | C1ql2 | complement component 1, q subcomponent-like 2 | 1.2601 | **1.5648** |
| ILMN_2719755 | NM_013732.3 | Cartpt | CART prepropeptide | 1.1726 | **1.5627** |
| ILMN_1248788 | NM_026671.1 | Lypd2 | Ly6/Plaur domain containing 2 | 1.0225 | **1.5493** |
| ILMN_2802590 | NM_153589.1 | Tmem16b | anoctamin 2 | 1.0050 | **1.5454** |
| ILMN_2492716 | NM_028283.2 | Uaca | uveal autoantigen with coiled-coil domains and ankyrin repeats | -1.0749 | **1.5404** |
| ILMN_1222246 | NM_007408.3 | Adfp | perilipin 2 | -1.0592 | **1.5355** |
| ILMN_2690603 | NM_009263.1 | Spp1 | secreted phosphoprotein 1 | -1.1680 | **1.5337** |
| ILMN_2795106 | NM_009993.2 | Cyp1a2 | cytochrome P450, family 1, subfamily a, polypeptide 2 | 0.0535 | **1.5320** |
| ILMN_1248028 | NM_010129.1 | Emp3 | epithelial membrane protein 3 | -1.2156 | **1.5315** |
| ILMN_2658501 | NM_025378.2 | Ifitm3 | interferon induced transmembrane protein 3 | -1.1562 | **1.5283** |
| ILMN_2701515 | NM_146191.3 | Lrrk1 | leucine-rich repeat kinase 1 | -1.0748 | **1.5245** |
| ILMN_2622217 | NM_013607.1 | Myh11 | myosin, heavy polypeptide 11, smooth muscle | -1.1908 | **1.5237** |
| ILMN_2970744 | NM_178414.2 | Acsm4 | acyl-CoA synthetase medium-chain family member 4 | -1.2210 | **1.4963** |
| ILMN_1246173 | NM_010835.2 | Msx1 | msh homeobox 1 | -1.1585 | **1.4959** |
| ILMN_2720836 | NM_178446.2 | Rbm47 | RNA binding motif protein 47 | -1.0823 | **1.4939** |
| ILMN_2710905 | NM_013650.2 | S100a8 | S100 calcium binding protein A8 (calgranulin A) | -1.1311 | **1.4885** |
| ILMN_2682207 | NM_007703.1 | Elovl3 | elongation of very long chain fatty acids (FEN1/Elo2, SUR4/Elo3, yeast)-like 3 | -1.0027 | **1.4851** |
| ILMN_1221820 | NM_026976.2 | Faim3 | Fc fragment of IgM receptor | -1.1577 | **1.4831** |
| ILMN_1225376 | NM_022316.1 | Smoc1 | SPARC related modular calcium binding 1 | -1.0897 | **1.4796** |
| ILMN_2676127 | NM_153790.2 | Scarf2 | scavenger receptor class F, member 2 | -1.0537 | **1.4736** |
| ILMN_1239430 | NM_008625.1 | Mrc1 | mannose receptor, C type 1 | -1.1963 | **1.4715** |
| ILMN_2760254 | NM_145379.2 | Mrgprf | MAS-related GPR, member F | -1.0837 | **1.4673** |
| ILMN_1238433 | NM_011254.2 | Rbp1 | retinol binding protein 1, cellular | -1.0226 | **1.4662** |
| ILMN_2957721 | NM_021340.2 | Rgr | retinal G protein coupled receptor | -1.0591 | **1.4633** |
| ILMN_2503052 | NM_009393.2 | Tnnc1 | troponin C, cardiac/slow skeletal | -1.2055 | **1.4627** |
| ILMN_1239102 | NM_010382.2 | H2-Eb1 | histocompatibility 2, class II antigen E beta | -1.1296 | **1.4611** |
| ILMN_2651556 | NM_031875.2 | Otof | otoferlin | -1.0970 | **1.4490** |
| ILMN_2856588 | NM_026860.1 | Gkn3 | gastrokine 3 | -1.0928 | **1.4484** |
| ILMN_2692644 | NM_145635.2 | Adig | adipogenin | -1.1381 | **1.4442** |
| ILMN_2762944 | NM_029803.1 | Ifi27 | interferon, alpha-inducible protein 27 | -1.0556 | **1.4429** |
| ILMN_1249828 | NM_027249.2 | Tlcd2 | TLC domain containing 2 | -1.0275 | **1.4428** |
| ILMN_1215446 | NM_007702.1 | Cidea | cell death-inducing DNA fragmentation factor, alpha subunit-like effector A | 1.0076 | **1.4419** |
| ILMN_1243329 | NM_023118.1 | Dab2 | disabled 2, mitogen-responsive phosphoprotein | -1.1134 | **1.4395** |
| ILMN_2519673 | NM_011708.3 | Vwf | Von Willebrand factor | -1.0779 | **1.4381** |
| ILMN_2672190 | NM_010495.2 | Id1 | inhibitor of DNA binding 1 | -1.1320 | **1.4376** |
| ILMN_3001540 | NM_008524.1 | Lum | lumican | -1.0425 | **1.4326** |
| ILMN_2756486 | NM_007472.2 | Aqp1 | aquaporin 1 | 0.3026 | **1.4282** |
| ILMN_2633091 | NM_053188.1 | Srd5a2 | steroid 5 alpha-reductase 2 | 1.1170 | **1.4247** |
| ILMN_1232667 | NM_030694.1 | Ifitm2 | interferon induced transmembrane protein 2 | -1.1221 | **1.4244** |
| ILMN_2645662 | NM_026436.3 | Tmem86a | transmembrane protein 86A | -1.0194 | **1.4225** |
| ILMN_1255871 | NM_010729.2 | Loxl1 | lysyl oxidase-like 1 | -1.2008 | **1.4191** |
| ILMN_2928489 | NM_013605.1 | Muc1 | mucin 1, transmembrane | -0.3402 | **1.4145** |
| ILMN_2591731 | NM_029928.1 | Ptprb | protein tyrosine phosphatase, receptor type, B | -1.0785 | **1.4137** |
| ILMN_2955973 | NM_013870.1 | Smtn | smoothelin | -1.0883 | **1.4067** |
| ILMN_2741096 | NM_011595.2 | Timp3 | tissue inhibitor of metalloproteinase 3 | 1.0618 | **1.4066** |
| ILMN_2914938 | NM_028784.2 | F13a1 | coagulation factor XIII, A1 subunit | -1.1435 | **1.4050** |
| ILMN_1221187 | NM_027631.2 | Cabs1 | calcium binding protein, spermatid specific 1 | -1.0182 | **1.4041** |
| ILMN_2675000 | NM_029070.2 | Tmem114 | transmembrane protein 114 | -1.1398 | **1.4028** |
| ILMN_2654754 | NM_010329.1 | PDPN | podoplanin | -1.1081 | **1.4018** |
| ILMN_2677921 | NM_139307.2 | Vasn | vasorin | -1.0502 | **1.3978** |
| ILMN_2451022 | NM_011701.3 | Vim | vimentin | -1.0970 | **1.3944** |
| ILMN_2667635 | NM_172469.3 | Clic6 | chloride intracellular channel 6 | -1.0634 | **1.3922** |
| ILMN_2487170 | NM_009416.3 | Tpm2 | tropomyosin 2, beta | -1.0781 | **1.3910** |
| ILMN_1229726 | NM_178887.3 | Fibcd1 | fibrinogen C domain containing 1 | -1.2296 | **1.3820** |
| ILMN_2755372 | NM_153803.1 | Glb1l2 | galactosidase, beta 1-like 2 | -1.0565 | **1.3764** |
| ILMN_2870672 | NM_010180.1 | Fbln1 | fibulin 1 | -1.0112 | **1.3728** |
| ILMN_2886618 | NM_008675.1 | Nbl1 | neuroblastoma, suppression of tumorigenicity 1 | -1.1902 | **1.3704** |
| ILMN_2745370 | NM_133670.1 | Sult1a1 | sulfotransferase family 1A, phenol-preferring, member 1 | -1.0714 | **1.3699** |
| ILMN_2761645 | NM_021564.2 | Fetub | fetuin beta | -1.1500 | **1.3683** |
| ILMN_2832979 | NM_016697.2 | Gpc3 | glypican 3 | -1.0624 | **1.3667** |
| ILMN_2955818 | NM_001029867.1 | Ugt2b36 | UDP glucuronosyltransferase 2 family, polypeptide B36 | 1.0192 | **1.3639** |
| ILMN_3079919 | NM_009643.1 | Ahnak | AHNAK nucleoprotein (desmoyokin) | -1.0454 | **1.3630** |
| ILMN_2665715 | NM_133994.3 | Gstt3 | glutathione S-transferase, theta 3 | -1.0818 | **1.3625** |
| ILMN_2463180 | NM_011607.1 | Tnc | tenascin C | -0.0278 | **1.3611** |
| ILMN_2868133 | NM_010258.3 | Gata6 | GATA binding protein 6 | 1.0982 | **1.3596** |
| ILMN_2669714 | NM_001038492.1 | Ctsa | cathepsin A | -1.0764 | **1.3575** |
| ILMN_1244169 | NM_009160.1 | Sftpd | surfactant associated protein D | 1.0390 | **1.3566** |
| ILMN_1220261 | NM_146010.1 | Tspan8 | tetraspanin 8 | 1.0097 | **1.3565** |
| ILMN_2594926 | NM_009999.3 | Cyp2b10 | cytochrome P450, family 2, subfamily b, polypeptide 10 | 1.0420 | **1.3563** |
| ILMN_2930897 | NM_008342.2 | Igfbp2 | insulin-like growth factor binding protein 2 | -1.1530 | **1.3556** |
| ILMN_1230890 | NM_010232.3 | Fmo5 | flavin containing monooxygenase 5 | 1.0201 | **1.3551** |
| ILMN_2466164 | NM_023395.1 | Wfdc1 | WAP four-disulfide core domain 1 | -1.1541 | **1.3549** |
| ILMN_1253741 | NM_008788.2 | Pcolce | procollagen C-endopeptidase enhancer protein | -1.1201 | **1.3545** |
| ILMN_3162470 | NM_001008419.1 | Aox3l1 | aldehyde oxidase 2 | -1.0954 | **1.3533** |
| ILMN_2717146 | NM_130456.3 | Nphs2 | nephrosis 2, podocin | -1.0962 | **1.3523** |
| ILMN_2982781 | NM_021542.2 | Kcnk5 | potassium channel, subfamily K, member 5 | 1.0478 | **1.3521** |
| ILMN_1224079 | NM_011716.2 | Wfs1 | wolframin ER transmembrane glycoprotein | -1.1331 | **1.3521** |
| ILMN_2647331 | NM_023699.2 | Nfatc4 | nuclear factor of activated T cells, cytoplasmic, calcineurin dependent 4 | -1.0959 | **1.3509** |
| ILMN_3115472 | NM_009701.4 | Aqp5 | aquaporin 5 | 1.0964 | **1.3506** |
| ILMN_1231939 | NM_173763.3 | Kyat3 | kynurenine aminotransferase 3 | -1.0010 | **1.3500** |
| ILMN_2625920 | NM_009675.1 | Aoc3 | amine oxidase, copper containing 3 | -1.1166 | **1.3488** |
| ILMN_2653617 | NM_007653.1 | Cd63 | CD63 antigen | -1.0698 | **1.3441** |
| ILMN_2668927 | XM_001479138.1 | LOC100047583 | apolipoprotein D-like | 1.0046 | **1.3436** |
| ILMN_2939138 | NM_031397.2 | Bicc1 | BicC family RNA binding protein 1 | -1.1140 | **1.3425** |
| ILMN_3162005 | NM_001001183.1 | Tmem204 | transmembrane protein 204 | 1.0221 | **1.3424** |
| ILMN_2677472 | XM_001476728.1 | Adarb1 | adenosine deaminase, RNA-specific, B1 | -1.0366 | **1.3414** |
| ILMN_1237934 | NM_009426.2 | Trh | thyrotropin releasing hormone | -1.1606 | **1.3411** |
| ILMN_2692615 | NM_009373.3 | Tgm2 | transglutaminase 2, C polypeptide | -1.1203 | **1.3409** |
| ILMN_2588055 | NM_007393.3 | Actb | actin, beta | -1.1712 | **1.3387** |
| ILMN_2622500 | NM_145356.3 | Zbtb7c | zinc finger and BTB domain containing 7C | -1.0818 | **1.3383** |
| ILMN_2960325 | NM_007799.2 | Ctse | cathepsin E | 1.0169 | **1.3376** |
| ILMN_2664224 | NM_010145.2 | Ephx1 | epoxide hydrolase 1, microsomal | -1.0468 | **1.3360** |
| ILMN_2687014 | NM_021282.2 | Cyp2e1 | cytochrome P450, family 2, subfamily e, polypeptide 1 | -1.1620 | **1.3360** |
| ILMN_2641678 | NM_027208.1 | Bdh2 | 3-hydroxybutyrate dehydrogenase, type 2 | -1.0954 | **1.3356** |
| ILMN_2757232 | NM_009700.1 | Aqp4 | aquaporin 4 | -1.1861 | **1.3341** |
| ILMN_1234471 | NM_007804.2 | Cux2 | cut-like homeobox 2 | -1.1345 | **1.3336** |
| ILMN_2948143 | NM_011990.2 | Slc7a11 | solute carrier family 7 (cationic amino acid transporter, y+ system), member 11 | -1.1271 | **1.3319** |
| ILMN_2735184 | NM_009929.2 | Col18a1 | collagen, type XVIII, alpha 1 | -1.1011 | **1.3313** |
| ILMN_2777019 | NM_012046.2 | Spo11 | SPO11 meiotic protein covalently bound to DSB | -1.0469 | **1.3311** |
| ILMN_1249727 | NM_024495.4 | Car13 | carbonic anhydrase 13 | -1.0801 | **1.3304** |
| ILMN_1234487 | NM_007426.3 | Angpt2 | angiopoietin 2 | -1.1464 | **1.3303** |
| ILMN_2693019 | NM_207668.2 | Acpp | acid phosphatase, prostate | -1.1019 | **1.3302** |
| ILMN_2783226 | NM_009335.1 | Tcfap2c | transcription factor AP-2, gamma | -0.0358 | **1.3293** |
| ILMN_3135781 | NM_013470.1 | Anxa3 | annexin A3 | -1.0579 | **1.3277** |
| ILMN_2699488 | NM_008483.2 | Lamb2 | laminin, beta 2 | -1.0764 | **1.3270** |
| ILMN_3151298 | NM_001025305.1 | Tcfap2b | transcription factor AP-2 beta | -1.0720 | **1.3264** |
| ILMN_1231590 | XM_979978.1 | Prss33 | protease, serine 33 | 1.0412 | **1.3258** |
| ILMN_1222014 | NM_009377.1 | Th | tyrosine hydroxylase | -1.1080 | **1.3249** |
| ILMN_2642913 | NM_010128.4 | Emp1 | epithelial membrane protein 1 | -1.0580 | **1.3224** |
| ILMN_2678218 | NM_008610.2 | Mmp2 | matrix metallopeptidase 2 | -1.0040 | **1.3218** |
| ILMN_3158499 | NM_001012336.1 | Mdk | midkine | -1.0005 | **1.3216** |
| ILMN_2704429 | NM_021791.3 | Doc2g | double C2, gamma | -1.1338 | **1.3211** |
| ILMN_2720663 | NM_001025103.1 | Cracr2b | calcium release activated channel regulator 2B | 1.0479 | **1.3202** |
| ILMN_2732430 | NM_026380.3 | Rgs8 | regulator of G-protein signaling 8 | -1.1470 | **1.3179** |
| ILMN_2893879 | NM_024228.2 | Gdpd3 | glycerophosphodiester phosphodiesterase domain containing 3 | -1.0098 | **1.3178** |
| ILMN_3161547 | NM_008725.2 | Nppa | natriuretic peptide type A | -1.1476 | **1.3170** |
| ILMN_1214483 | NM_007759.2 | Crabp2 | cellular retinoic acid binding protein II | -1.0607 | **1.3166** |
| ILMN_2754364 | NM_008522.3 | Ltf | lactotransferrin | -1.1217 | **1.3153** |
| ILMN_2784446 | NM_011441.2 | Sox17 | SRY (sex determining region Y)-box 1 | -1.0452 | **1.3145** |
| ILMN_2917497 | NM_010189.1 | Fcgrt | Fc receptor, IgG, alpha chain transporter | 1.0105 | **1.3143** |
| ILMN_1215901 | NM_026212.1 | Agpat2 | 1-acylglycerol-3-phosphate O-acyltransferase 2 (lysophosphatidic acid acyltransferase, beta) | -1.1792 | **1.3134** |
| ILMN_2927638 | NM_024263.3 | Mxra8 | matrix-remodelling associated 8 [Mus musculus | -1.0184 | **1.3120** |
| ILMN_2690938 | NM_145920.2 | Evc2 | EvC ciliary complex subunit 2 | -1.1107 | **1.3091** |
| ILMN_2602938 | NM_133888.2 | Smpdl3b | sphingomyelin phosphodiesterase, acid-like 3B | 1.0426 | **1.3089** |
| ILMN_2723726 | NM_198662.2 | Aadacl4 | arylacetamide deacetylase like 4 | 1.0153 | **1.3077** |
| ILMN_2903455 | NM_138665.1 | Sardh | sarcosine dehydrogenase | -1.1189 | **1.3067** |
| ILMN_2901765 | NM_009526.3 | Wnt6 | wingless-type MMTV integration site family, member 6 | -1.0194 | **1.3063** |
| ILMN_2868280 | NM_026428.1 | Dcxr | dicarbonyl L-xylulose reductase | -1.0357 | **1.3046** |
| ILMN_1246821 | NM_178791.4 | Vstm4 | V-set and transmembrane domain containing 4 | -1.0847 | **1.3032** |
| ILMN_2604029 | NM_008452.1 | Klf2 | Kruppel-like factor 2 (lung) | -1.0821 | **1.3025** |
| ILMN_2914271 | NM_009703.1 | Araf | Araf proto-oncogene, serine/threonine kinase | -1.1124 | **1.3018** |
| ILMN_2722616 | NM_016958.1 | Krt14 | keratin 14 | 1.0290 | **1.3016** |
| ILMN_1212702 | NM_008218.2 | Hba-a1 | hemoglobin alpha, adult chain 1 | 1.0482 | **1.3010** |
| ILMN_1219471 | NM_139300.3 | Mylk | myosin, light polypeptide kinase | -1.1017 | **1.3009** |
| ILMN_1221157 | NM_031170.2 | Krt8 | keratin 8 | 1.0035 | **1.3003** |
| ILMN_2628629 | NM_009864.2 | Cdh1 | cadherin 1 | 1.0083 | **1.3003** |
| ILMN_1239397 | XM_001478074.1 | Hk2 | hexokinase 2 | -1.0572 | **1.3000** |
| ILMN_2636424 | NM_145467.1 | Itgbl1 | integrin, beta-like 1 | -1.0241 | **1.2996** |
| ILMN_2692723 | NM_008509.2 | Lpl | lipoprotein lipase | -1.0727 | **1.2985** |
| ILMN_3112873 | NM_001009935.2 | Txnip | thioredoxin interacting protein | 1.0347 | **1.2965** |
| ILMN_2666312 | NM_145987.2 | Tmem82 | transmembrane protein 82 | -1.0528 | **1.2964** |
| ILMN_2519676 | NM_138579.2 | Triobp | TRIO and F-actin binding protein | -1.0566 | **1.2961** |
| ILMN_1249000 | NM_024283.2 | 1500015O10Rik | RIKEN cDNA 1500015O10 gene | -1.0186 | **1.2943** |
| ILMN_2739760 | NM_054077.3 | Prelp | proline arginine-rich end leucine-rich repeat | -1.1085 | **1.2932** |
| ILMN_2687156 | NM_176963.4 | Galm | galactose mutarotase | 1.0101 | **1.2927** |
| ILMN_2913222 | NM_001025103.1 | Efcab4a | calcium release activated channel regulator 2B | 1.0140 | **1.2926** |
| ILMN_2712120 | NM_011313.2 | S100a6 | S100 calcium binding protein A6 (calcyclin) | 1.0306 | **1.2916** |
| ILMN_2810424 | NM_009576.2 | Zic4 | zinc finger protein of the cerebellum 4 | -1.1577 | **1.2906** |
| ILMN_2755195 | NM_019567.2 | Acin1 | apoptotic chromatin condensation inducer 1 | -1.0563 | **1.2900** |
| ILMN_2736380 | NM_010125.2 | Elf5 | E74-like factor 5 | -1.0398 | **1.2894** |
| ILMN_2666136 | NM_174988.2 | Cdh22 | cadherin 22 | -1.2502 | **1.2890** |
| ILMN_2675874 | NM_009653.1 | Alas2 | aminolevulinic acid synthase 2, erythroid | -1.0324 | **1.2868** |
| ILMN_2589662 | NM_007557.2 | Bmp7 | bone morphogenetic protein 7 | 1.0053 | **1.2862** |
| ILMN_1222036 | NM_027995.2 | Paqr7 | progestin and adipoQ receptor family member VII | -1.1156 | **1.2852** |
| ILMN_2784272 | NM_008338.2 | Ifngr2 | interferon gamma receptor 2 | -1.0291 | **1.2851** |
| ILMN_1213978 | NM_011216.2 | Ptpro | protein tyrosine phosphatase, receptor type, O | -1.2340 | **1.2822** |
| ILMN_1214405 | NM_177751.2 | Cnksr2 | connector enhancer of kinase suppressor of Ras 2 | -1.1791 | **1.2817** |
| ILMN_2944666 | NM_010501.1 | Ifit3 | interferon-induced protein with tetratricopeptide repeats 3 | -1.0180 | **1.2797** |
| ILMN_2998807 | NM_199018.1 | Stard8 | START domain containing 8 | -1.2436 | **1.2773** |
| ILMN_3115213 | NM_010574.2 | Irx2 | Iroquois homeobox 2 | -1.0308 | **1.2772** |
| ILMN_2614966 | NM_023635.4 | Rab27a | RAB27A, member RAS oncogene family | -1.0263 | **1.2765** |
| ILMN_2814005 | NM_010917.1 | Nid1 | nidogen 1 | -1.0314 | **1.2764** |
| ILMN_1237725 | NM_173451.2 | Arsj | arylsulfatase J | 1.0716 | **1.2756** |
| ILMN_2963483 | NM_030697.1 | Ankrd47 | KN motif and ankyrin repeat domains 3 | -1.1495 | **1.2756** |
| ILMN_1229662 | NM_023438.2 | Tmem132e | transmembrane protein 132E | 1.0017 | **1.2754** |
| ILMN_2938893 | NM_016769.2 | Smad3 | SMAD family member 3 | 1.0090 | **1.2752** |
| ILMN_2722716 | NM_178405.3 | Atp1a2 | ATPase, Na+/K+ transporting, alpha 2 polypeptide | -1.0870 | **1.2744** |
| ILMN_1224855 | XM_620286.3 | Samd9l | sterile alpha motif domain containing 9-like | -1.0817 | **1.2738** |
| ILMN_3103575 | NM_001012451.1 | Ankrd6 | ankyrin repeat domain 6 | -1.0710 | **1.2737** |
| ILMN_1216764 | NM_133662.2 | Ier3 | immediate early response 3 | -1.1377 | **1.2728** |
| ILMN_2699531 | NM_026418.2 | Rgs10 | regulator of G-protein signalling 10 | -1.0954 | **1.2724** |
| ILMN_1227352 | NM_175506.3 | Adamts19 | a disintegrin-like and metallopeptidase (reprolysin type) with thrombospondin type 1 motif, 19 | -1.2895 | **1.2721** |
| ILMN_2685329 | XM_978879.2 | Hspg2 | perlecan (heparan sulfate proteoglycan 2) | -1.0352 | **1.2721** |
| ILMN_2903169 | NM_001033356.2 | Ntn5 | netrin 5 | -1.0324 | **1.2718** |
| ILMN_2980177 | NM_177699.2 | Fhod1 | formin homology 2 domain containing 1 | -1.0844 | **1.2714** |
| ILMN_2625855 | NM_027127.2 | Gpx8 | glutathione peroxidase 8 (putative) | -1.0158 | **1.2712** |
| ILMN_2701778 | NM_176922.4 | Itga11 | integrin alpha 11 | -1.1574 | **1.2702** |
| ILMN_2630753 | NM_009022.3 | Aldh1a2 | aldehyde dehydrogenase family 1, subfamily A2 | -1.1224 | **1.2698** |
| ILMN_2659997 | NM_146230.3 | Acaa1b | acetyl-Coenzyme A acyltransferase 1B | -1.0504 | **1.2696** |
| ILMN_2715903 | NM_008965.1 | Ptger4 | prostaglandin E receptor 4 (subtype EP4) | -1.0501 | **1.2695** |
| ILMN_2991389 | NM_027366.1 | Ly6g6e | lymphocyte antigen 6 complex, locus G6E | -1.0751 | **1.2686** |
| ILMN_2589401 | NM_011125.2 | Pltp | phospholipid transfer protein | -1.0567 | **1.2683** |
| ILMN_2854157 | NM_007474.1 | Aqp8 | aquaporin 8 | 1.0495 | **1.2679** |
| ILMN_1215085 | NM_010221.1 | Fkbp10 | FK506 binding protein 10 | -1.0832 | **1.2673** |
| ILMN_3107059 | NM_207690.2 | Espn | espin | -1.0831 | **1.2672** |
| ILMN_1230788 | NM_011599.3 | Tle1 | transducin-like enhancer of split 1 | -1.0400 | **1.2665** |
| ILMN_2721439 | NM_007792.3 | Csrp2 | cysteine and glycine-rich protein 2 | -1.0167 | **1.2656** |
| ILMN_2752030 | NM_009784.1 | Cacna2d1 | calcium channel, voltage-dependent, alpha2/delta subunit 1 | -1.1699 | **1.2638** |
| ILMN_2963580 | NM_172947.1 | Lsm12 | LSM12 homolog | -1.0777 | **1.2631** |
| ILMN_2730888 | NM_031194.3 | Slc22a8 | solute carrier family 22 (organic anion transporter), member 8 | -1.0092 | **1.2630** |
| ILMN_2670427 | NM_025946.3 | Romo1 | reactive oxygen species modulator 1 | -1.0874 | **1.2625** |
| ILMN_2900484 | NM_001079932.1 | Trim72 | tripartite motif-containing 72 | -1.0708 | **1.2616** |
| ILMN_1240973 | NM_146257.2 | Slc29a4 | solute carrier family 29 (nucleoside transporters), member 4 | 1.0398 | **1.2615** |
| ILMN_3117602 | NM_009852.3 | Cd6 | CD6 antigen | -1.4222 | **1.2611** |
| ILMN_2661422 | NM_019444.2 | Ramp2 | receptor (calcitonin) activity modifying protein 2 | -1.0189 | **1.2607** |
| ILMN_2494032 | XM_001473431.1 | LOC100044766 | similar to WW domain-containing adapter protein with coiled-coil | -1.1752 | **1.2605** |
| ILMN_2765662 | NM_021487.1 | Kcne1l | potassium voltage-gated channel, Isk-related family, member 1-like, pseudogene | -1.0838 | **1.2599** |
| ILMN_2886260 | NM_008592.2 | Foxc1 | forkhead box C1 [Mus musculus | -1.0835 | **1.2596** |
| ILMN_2619846 | NM_153150.1 | Slc25a1 | solute carrier family 25 (mitochondrial carrier, citrate transporter), member 1 | -1.0375 | **1.2594** |
| ILMN_2735829 | NM_178260.2 | Kiss1 | KiSS-1 metastasis-suppressor | -1.0663 | **1.2591** |
| ILMN_2787238 | NM_010471.2 | Hpca | hippocalcin | -1.1519 | **1.2590** |
| ILMN_2639417 | NM_146985.1 | Olfr1270 | olfactory receptor 1270 | -1.0414 | **1.2586** |
| ILMN_2673917 | NM_144882.3 | Spats2l | spermatogenesis associated, serine-rich 2-like | -1.1880 | **1.2580** |
| ILMN_1227926 | NM_010228.3 | Flt1 | FMS-like tyrosine kinase 1 | -1.1532 | **1.2560** |
| ILMN_1242399 | NM_023422.3 | Hist1h2bc | histone cluster 1, H2bc | -1.0981 | **1.2559** |
| ILMN_2907560 | NM_008057.2 | Fzd7 | frizzled class receptor 7 | -1.0703 | **1.2555** |
| ILMN_1241437 | NM_010356.3 | Gsta3 | glutathione S-transferase, alpha 3 | 1.0203 | **1.2553** |
| ILMN_1216042 | NM_009696.2 | Apoe | apolipoprotein E | -1.0928 | **1.2538** |
| ILMN_3029489 | NM_001033302.1 | Ciart | circadian associated repressor of transcription | 1.4507 | **1.2530** |
| ILMN_2991272 | NM_016689.2 | Aqp3 | aquaporin 3 | -1.0404 | **1.2526** |
| ILMN_2721466 | NM_172870.3 | Bnc2 | basonuclin 2 | -1.1099 | **1.2526** |
| ILMN_1255211 | NM_170673.3 | Cpne9 | copine family member IX | -1.1248 | **1.2525** |
| ILMN_3139875 | NM_012006.2 | Acot1 | acyl-CoA thioesterase 1 | -1.0594 | **1.2500** |
| ILMN_2651715 | NM_009465.3 | Axl | AXL receptor tyrosine kinase | -1.0894 | **1.2498** |
| ILMN_1229547 | NM_133903.2 | Spon2 | spondin 2, extracellular matrix protein | -1.1643 | **1.2488** |
| ILMN_1234111 | NM_011707.1 | Vtn | vitronectin | -1.0672 | **1.2485** |
| ILMN_2671385 | NM_175296.4 | Mael | maelstrom spermatogenic transposon silencer | -1.0996 | **1.2482** |
| ILMN_1231066 | NM_178214.3 | Hist2h2be | histone cluster 2, H2be [Mus musculus | -1.1463 | **1.2481** |
| ILMN_2655795 | NM_007607.1 | Car4 | carbonic anhydrase 4 | -1.0944 | **1.2470** |
| ILMN_2611431 | NM_008913.3 | Ppp3ca | protein phosphatase 3, catalytic subunit, alpha isoform | -1.0094 | **1.2468** |
| ILMN_2877069 | NM_009775.2 | Tspo | translocator protein | -1.0345 | **1.2464** |
| ILMN_1258292 | NM_027373.2 | Afap1 | actin filament associated protein 1 | -1.0801 | **1.2463** |
| ILMN_2641201 | NM_022435.2 | Sp5 | trans-acting transcription factor 5 | -1.1004 | **1.2459** |
| ILMN_1236317 | NM_033078.2 | Klrk1 | killer cell lectin-like receptor subfamily K, member 1 | 1.0478 | **1.2457** |
| ILMN_1246710 | NM_172775.1 | Plxnb1 | plexin B1 | -1.0232 | **1.2451** |
| ILMN_2748222 | NM_021344.2 | Tesc | tescalcin | -1.2670 | **1.2451** |
| ILMN_2789925 | NM_001033292.1 | Espnl | espin-like | -1.1877 | **1.2450** |
| ILMN_1259564 | NM_019440.2 | Iigp2 | immunity-related GTPase family M member 2 | -1.0578 | **1.2437** |
| ILMN_1226016 | NM_198885.2 | Scx | scleraxis | 1.0688 | **1.2435** |
| ILMN_2829262 | NM_175641.1 | Ltbp4 | latent transforming growth factor beta binding protein 4 | -1.0491 | **1.2428** |
| ILMN_2728729 | NM_011521.2 | Sdc4 | syndecan 4 | -1.0170 | **1.2420** |
| ILMN_2650468 | NM_146960 | Olfr53 | olfactory receptor 53 | -1.1710 | **1.2419** |
| ILMN_2965399 | NM_170599.2 | Igsf11 | immunoglobulin superfamily, member 11 | 1.0234 | **1.2419** |
| ILMN_2658461 | NM_181390.2 | Mustn1 | musculoskeletal, embryonic nuclear protein 1 | -1.0165 | **1.2412** |
| ILMN_1219574 | NM_175661.1 | Hist1h2af | histone cluster 1, H2af | -1.0225 | **1.2410** |
| ILMN_2599955 | NM_145534.1 | Btbd3 | BTB (POZ) domain containing 3 | -1.2074 | **1.2409** |
| ILMN_2430813 | NM_026131 | Pdlim7 | PDZ and LIM domain 7 | -1.2070 | **1.2408** |
| ILMN_2749448 | NM_153119.2 | Plekho2 | pleckstrin homology domain containing, family O member 2 | -1.1698 | **1.2408** |
| ILMN_2973288 | NM_008480.2 | Lama1 | laminin, alpha 1 | -1.0929 | **1.2406** |
| ILMN_2617005 | NM_011169.4 | Prlr | prolactin receptor | 1.0972 | **1.2404** |
| ILMN_2760979 | NM_009371.2 | Tgfbr2 | transforming growth factor, beta receptor II | -1.1415 | **1.2402** |
| ILMN_2752569 | NM_145457.3 | Paip1 | polyadenylate binding protein-interacting protein 1 | -1.1652 | **1.2399** |
| ILMN_1249941 | NM_145741.2 | Gdf10 | growth differentiation factor 10 | -1.0676 | **1.2383** |
| ILMN_3008859 | NM_009982.2 | Ctsc | cathepsin C | -1.0910 | **1.2382** |
| ILMN_1260219 | NM_197985.2 | Adipor2 | adiponectin receptor 2 | 1.0643 | **1.2382** |
| ILMN_1248998 | NM_133213.2 | Xpnpep2 | X-prolyl aminopeptidase (aminopeptidase P) 2, membrane-bound | -1.0953 | **1.2379** |
| ILMN_2892441 | NM_010357.1 | Gsta4 | glutathione S-transferase, alpha 4 | 1.0015 | **1.2379** |
| ILMN_2740151 | NM_144807.2 | Chpt1 | choline phosphotransferase 1 | -0.3508 | **1.2375** |
| ILMN_2460136 | NM_011618.1 | Tnnt1 | troponin T1, skeletal, slow | -1.1085 | **1.2373** |
| ILMN_2874270 | NM_010451.1 | Hoxa2 | homeobox A2 | -1.1405 | **1.2371** |
| ILMN_1252076 | NM_017372.3 | Lyz2 | lysozyme 2 | -1.1421 | **1.2371** |
| ILMN_2758896 | XM_126427.5 | Trp53i13 | transformation related protein 53 inducible protein 13 | 1.0639 | **1.2355** |
| ILMN_1215469 | NM_007830.3 | Dbi | diazepam binding inhibitor | 1.0334 | **1.2353** |
| ILMN_3074259 | NM_001017959.1 | Lamp2 | lysosomal-associated membrane protein 2 | 1.0293 | **1.2352** |
| ILMN_2492264 | NM_018865.2 | Wisp1 | WNT1 inducible signaling pathway protein 1 | -1.2222 | **1.2352** |
| ILMN_2589651 | NM_008486.1 | Anpep | alanyl (membrane) aminopeptidase | -1.0582 | **1.2350** |
| ILMN_2928599 | NM_178706.2 | Siglech | sialic acid binding Ig-like lectin H | -1.1165 | **1.2348** |
| ILMN_2628098 | NM_175638.2 | Wnk4 | WNK lysine deficient protein kinase 4 | -1.1681 | **1.2347** |
| ILMN_1230545 | NM_145571 | Mobk1b | MOB kinase activator 1A | -1.0897 | **1.2345** |
| ILMN_2681057 | NM_025408.2 | Phca | hth-type transcriptional regulator phca | -1.0268 | **1.2344** |
| ILMN_2589011 | NM_008497.2 | Lhb | luteinizing hormone beta | -1.0611 | **1.2344** |
| ILMN_1226754 | NM_018774.3 | Phc2 | polyhomeotic 2 | -1.1539 | **1.2340** |
| ILMN_3026557 | NM_001042675.1 | Rbpms | RNA binding protein gene with multiple splicing | -1.0277 | **1.2336** |
| ILMN_2698046 | NM_213659.2 | Stat3 | signal transducer and activator of transcription 3 | -1.0686 | **1.2334** |
| ILMN_2872058 | NM_007801.1 | Ctsh | cathepsin H | -1.0115 | **1.2333** |
| ILMN_2957070 | NM_011368.3 | Shc1 | src homology 2 domain-containing transforming protein C1 | -1.0329 | **1.2327** |
| ILMN_3042923 | NM_199366.2 | Gal3st2 | galactose-3-O-sulfotransferase 2 | 1.0235 | **1.2319** |
| ILMN_2509052 | NM_177226.5 | Zfp629 | zinc finger protein 629 | -1.1480 | **1.2311** |
| ILMN_2820379 | NM_028019.1 | Rnf135 | ring finger protein 135 | -1.0995 | **1.2309** |
| ILMN_1245994 | NM_010227.2 | Flna | filamin, alpha | 1.0084 | **1.2308** |
| ILMN_3130403 | NM_174992.3 | Smagp | small cell adhesion glycoprotein | -1.0842 | **1.2307** |
| ILMN_1253942 | NM_013481.1 | Bop1 | block of proliferation 1 | -1.1059 | **1.2301** |
| ILMN_1254630 | NM_011212.3 | Ptpre | protein tyrosine phosphatase, receptor type, E | -1.0424 | **1.2300** |
| ILMN_1258159 | NM_011400.2 | Slc2a1 | solute carrier family 2 (facilitated glucose transporter), member 1 | 1.0332 | **1.2299** |
| ILMN_2619707 | NM_175316.3 | Slco2b1 | solute carrier organic anion transporter family, member 2b1 | -1.0145 | **1.2295** |
| ILMN_2658130 | NM_145419.1 | Hkdc1 | hexokinase domain containing 1 | 1.1345 | **1.2292** |
| ILMN_1240726 | NM_008608.2 | Mmp14 | matrix metallopeptidase 14 (membrane-inserted) | -1.2415 | **1.2289** |
| ILMN_3109289 | NM_001079822.1 | Tcf3 | transcription factor 3 | -1.0635 | **1.2289** |
| ILMN_1258526 | NM_011150.2 | Lgals3bp | lectin, galactoside-binding, soluble, 3 binding protein | -1.0492 | **1.2275** |
| ILMN_2727432 | NM_138672.2 | Stab1 | stabilin 1 | -1.1050 | **1.2275** |
| ILMN_1226195 | NM_013863.4 | Bag3 | BCL2-associated athanogene 3 | -1.1481 | **1.2273** |
| ILMN_2608703 | NM_009714.2 | Asgr1 | asialoglycoprotein receptor 1 | -1.0425 | **1.2269** |
| ILMN_2665666 | NM_011193.1 | Pstpip1 | proline-serine-threonine phosphatase-interacting protein 1 | -1.0671 | **1.2267** |
| ILMN_2627193 | NM_178870.4 | Hs3st3a1 | heparan sulfate (glucosamine) 3-O-sulfotransferase 3A1 | -1.0013 | **1.2266** |
| ILMN_2769918 | NM_011593 | Timp1 | tissue inhibitor of metalloproteinase 1 | -1.1208 | **1.2266** |
| ILMN_2490479 | NM_018753.5 | Ywhab | tyrosine 3-monooxygenase/tryptophan 5-monooxygenase activation protein, beta polypeptide | -1.0731 | **1.2261** |
| ILMN_2694360 | NM_054095.2 | Necab2 | N-terminal EF-hand calcium binding protein 2 | -1.0144 | **1.2260** |
| ILMN_2896843 | NM_054042.2 | Cd248 | CD248 antigen, endosialin | -1.0243 | **1.2257** |
| ILMN_1250766 | NM_021495.2 | Pvrl3 | poliovirus receptor-related 3 | -1.2694 | **1.2257** |
| ILMN_1241949 | NM_010056.2 | Dlx5 | distal-less homeobox 5 | -1.1278 | **1.2255** |
| ILMN_2903364 | NM_009302.2 | Swap70 | SWA-70 protein | -1.0004 | **1.2248** |
| ILMN_2773835 | XM_978692.1 | Smad6 | Mothers against decapentaplegic homolog 6 | -1.0752 | **1.2243** |
| ILMN_2590950 | NM_009642.4 | Agtrap | angiotensin II, type I receptor-associated protein | -1.1092 | **1.2240** |
| ILMN_1213736 | NM_027519.3 | Medag | mesenteric estrogen dependent adipogenesis | -1.3027 | **1.2238** |
| ILMN_1259982 | XM_001476512.1 | LOC100046616 | LOC100046616 | -1.0463 | **1.2236** |
| ILMN_2601833 | NM_172285.1 | Plcg2 | phospholipase C, gamma 2 | -1.0536 | **1.2235** |
| ILMN_3040693 | NM_011836.3 | Lamc3 | laminin gamma 3 | -1.0425 | **1.2231** |
| ILMN_2629112 | NM_139306.1 | Asah3l | alkaline ceramidase 2 | -1.0398 | **1.2230** |
| ILMN_1260046 | NM_145512.3 | Sft2d2 | SFT2 domain containing 2 | -1.0459 | **1.2228** |
| ILMN_2652500 | NM_029796.2 | Lrg1 | leucine-rich alpha-2-glycoprotein 1 | -1.0158 | **1.2226** |
| ILMN_2769234 | NM_008747.2 | Ntsr2 | neurotensin receptor 2 | -1.1225 | **1.2219** |
| ILMN_3078932 | NM_001081402.1 | Wdr70 | WD repeat domain 70 | -1.0644 | **1.2213** |
| ILMN_2708928 | NM_175177.3 | Bdh1 | 3-hydroxybutyrate dehydrogenase, type 1 | -1.2160 | **1.2210** |
| ILMN_1242170 | NM_007417.2 | Adra2a | adrenergic receptor, alpha 2a | -1.0352 | **1.2207** |
| ILMN_2606667 | NM_007841.3 | Ddx6 | DEAD (Asp-Glu-Ala-Asp) box polypeptide 6 | -1.2142 | **1.2206** |
| ILMN_2491186 | NM_009573.3 | Zic1 | zinc finger protein of the cerebellum 1 | -1.0286 | **1.2203** |
| ILMN_1251237 | NM_146017.3 | Gabrp | gamma-aminobutyric acid (GABA) A receptor, pi | -1.1534 | **1.2201** |
| ILMN_2829604 | NM_007378.1 | Abca4 | ATP-binding cassette, sub-family A (ABC1), member 4 | -1.0322 | **1.2198** |
| ILMN_1217003 | NM_001081115.1 | Nccrp1 | non-specific cytotoxic cell receptor protein 1 homolog (zebrafish) | -1.1173 | **1.2196** |
| ILMN_2589952 | NM_033577.1 | Pcdhgb5 | protocadherin gamma subfamily B, 5 | -1.1783 | **1.2195** |
| ILMN_2533336 | XM_146438.3 | Ces1a | carboxylesterase 1A | -1.1718 | **1.2194** |
| ILMN_1215824 | NM_133704.3 | Sec22l2 | SEC22 homolog A, vesicle trafficking protein | 1.0173 | **1.2192** |
| ILMN_2965773 | NM_053256.1 | Pth2 | parathyroid hormone 2 | -1.1373 | **1.2190** |
| ILMN_2707015 | NM_027985.2 | Mad2l2 | MAD2 mitotic arrest deficient-like 2 | -1.0759 | **1.2188** |
| ILMN_2700166 | NM_009829.3 | Ccnd2 | cyclin D2 | -1.0748 | **1.2182** |
| ILMN_2819679 | NM_027935.2 | Tmem50a | transmembrane protein 50A | -1.2022 | **1.2179** |
| ILMN_2650008 | NM_010195.2 | Lgr5 | leucine rich repeat containing G protein coupled receptor 5 | -1.0233 | **1.2177** |
| ILMN_2834379 | NM_009369.1 | Tgfbi | transforming growth factor, beta induced | -1.0144 | **1.2176** |
| ILMN_1220743 | NM_009548.2 | Rnf112 | ring finger protein 112 | -1.0503 | **1.2173** |
| ILMN_2720537 | NM_207564.1 | Olfr1083 | olfactory receptor 1083 | -1.0122 | **1.2166** |
| ILMN_2525111 | XM_130253.3 | Cybrd1 | cytochrome b reductase 1 | -1.1556 | **1.2165** |
| ILMN_2945030 | NM_007741.1 | Col9a2 | collagen, type IX, alpha 2 | -1.1229 | **1.2165** |
| ILMN_2986122 | NM_146949.1 | Olfr339 | olfactory receptor 339 | -1.0726 | **1.2159** |
| ILMN_2513826 | NM_008764.3 | Tnfrsf11b | tumor necrosis factor receptor superfamily, member 11b (osteoprotegerin) | -1.0545 | **1.2154** |
| ILMN_2962810 | NM_001005225.1 | Olfr1197 | olfactory receptor 1197 | -1.0174 | **1.2151** |
| ILMN_2987862 | NM_011066.1 | Per2 | period circadian clock 2 | 1.1568 | **1.2145** |
| ILMN_1253984 | NM_147220.2 | Abca9 | ATP-binding cassette, sub-family A (ABC1), member 9 | 1.0177 | **1.2142** |
| ILMN_1254036 | NM_170593.2 | Disp2 | dispatched RND tramsporter family member 2 | 1.0267 | **1.2142** |
| ILMN_1229698 | NM_139233.1 | Fgd4 | FYVE, RhoGEF and PH domain containing 4 | 1.0210 | **1.2141** |
| ILMN_2725188 | NM_009728.1 | Atp10a | ATPase, class V, type 10A | 1.0409 | **1.2140** |
| ILMN_2754158 | NM_011579.2 | Tgtp | T cell specific GTPase 1 | -1.1801 | **1.2138** |
| ILMN_2686721 | NM_011530.2 | Tap2 | transporter 2, ATP-binding cassette, sub-family B (MDR/TAP) | -1.0499 | **1.2137** |
| ILMN_2612283 | NM_008090.4 | Gata2 | GATA binding protein 2 | -1.0524 | **1.2137** |
| ILMN_1250356 | NM_001010937.1 | Gjb6 | gap junction protein, beta 6 | -1.1527 | **1.2137** |
| ILMN_2766930 | NM_010173.3 | Faah | fatty acid amide hydrolase | -1.0567 | **1.2135** |
| ILMN_3132346 | NM_001034898.1 | Ms4a15 | membrane-spanning 4-domains, subfamily A, member 15 | -1.1226 | **1.2132** |
| ILMN_2746283 | NM_194464.2 | Mrvi1 | MRV integration site 1 | -1.0506 | **1.2127** |
| ILMN_1250704 | NM_178593.3 | Rcsd1 | RCSD domain containing 1 | 1.0041 | **1.2122** |
| ILMN_1218116 | NM_009755.2 | Bmp1 | bone morphogenetic protein 1 | -1.0520 | **1.2122** |
| ILMN_2679937 | XM_001475483.1 | LOC100046056 | similar to Pre-B-cell leukemia transcription factor interacting protein 1 | -1.1007 | **1.2121** |
| ILMN_1216763 | NM_030147.2 | Brd8 | bromodomain containing 8 | -1.1406 | **1.2120** |
| ILMN_1237921 | NM_172426.2 | Slc24a2 | solute carrier family 24 (sodium/potassium/calcium exchanger), member 2 | -1.2541 | **1.2120** |
| ILMN_2734729 | NM_010378.2 | H2-Aa | histocompatibility 2, class II antigen A, alpha | -1.0146 | **1.2119** |
| ILMN_2763366 | NM_013667.2 | Slc22a2 | solute carrier family 22 (organic cation transporter), member 2 | -1.0113 | **1.2115** |
| ILMN_1221060 | NM_011146.2 | Pparg | peroxisome proliferator activated receptor gamma | -1.0693 | **1.2110** |
| ILMN_2685023 | NM_027521.2 | Hmha1 | histocompatibility (minor) HA-1 | -1.0924 | **1.2108** |
| ILMN_2984012 | NM_007997.1 | Fdxr | ferredoxin reductase | -1.0743 | **1.2107** |
| ILMN_2870320 | NM_178900.2 | Prkd2 | protein kinase D2 | 1.0031 | **1.2102** |
| ILMN_2944765 | NM_172666.2 | Agps | alkylglycerone phosphate synthase | -1.0153 | **1.2100** |
| ILMN_2941081 | NM_028310.1 | 2810006K23Rik | RIKEN cDNA 2810006K23 gene | -1.1555 | **1.2096** |
| ILMN_2810539 | NM_001081015.1 | H2-K2 | histocompatibility 2, K region locus 2 | -1.1161 | **1.2094** |
| ILMN_2772077 | NM_016778 | Bok | BCL2-related ovarian killer | -1.1624 | **1.2093** |
| ILMN_1258158 | NM_134042.2 | Aldh6a1 | aldehyde dehydrogenase family 6, subfamily A1 | -1.0424 | **1.2093** |
| ILMN_2809571 | NM_001034863.1 | Tmem136 | transmembrane protein 136 | -1.0812 | **1.2087** |
| ILMN_1217309 | NM_029564.2 | Tax1bp3 | Tax1 (human T cell leukemia virus type I) binding protein 3 | -1.0566 | **1.2085** |
| ILMN_2953277 | NM_001025388.1 | Eno1b | enolase 1B, retrotransposed | 1.0838 | **1.2084** |
| ILMN_2623920 | NM_013662.1 | Sema6b | sema domain, transmembrane domain (TM), and cytoplasmic domain, (semaphorin) 6B | -1.0213 | **1.2084** |
| ILMN_2704096 | NM_177808.3 | Gm5082 | predicted gene 5082 | -1.1242 | **1.2079** |
| ILMN_2476139 | XM_147357.1 | Tuba6 | tubulin, alpha 6 | 1.0089 | **1.2078** |
| ILMN_2503329 | NM_145453.2 | Zcchc9 | zinc finger, CCHC domain containing 9 | -1.0994 | **1.2078** |
| ILMN_2658741 | NM_199154.1 | Tas2r107 | taste receptor, type 2, member 107 | -1.1149 | **1.2077** |
| ILMN_2873131 | NM_001025246.1 | Trp53i11 | transformation related protein 53 inducible protein 11 | 1.0042 | **1.2077** |
| ILMN_2759563 | NM_028022.1 | Castor1 | cytosolic arginine sensor for mTORC1 subunit 1 | -1.1265 | **1.2074** |
| ILMN_2631518 | NM_011353.1 | Serf1 | small EDRK-rich factor 1 | -1.0053 | **1.2072** |
| ILMN_2756615 | NM_177465.4 | Umodl1 | uromodulin-like 1 | -1.0032 | **1.2068** |
| ILMN_2664858 | NM_028001.2 | Jsrp1 | junctional sarcoplasmic reticulum protein 1 | -1.0701 | **1.2067** |
| ILMN_3032088 | NM_172899.2 | Dmkn | dermokine | -1.1941 | **1.2065** |
| ILMN_2592823 | NM_021454.3 | Cdc42ep5 | CDC42 effector protein (Rho GTPase binding) 5 | 1.0715 | **1.2063** |
| ILMN_3134598 | NM_001024606.1 | Pdp2 | pyruvate dehyrogenase phosphatase catalytic subunit 2 | -1.0784 | **1.2062** |
| ILMN_2907214 | NM_011542.1 | Tcea3 | transcription elongation factor A (SII), 3 | -1.0299 | **1.2055** |
| ILMN_1260420 | NM_146177.1 | Kmt5c | lysine methyltransferase 5C | -1.1009 | **1.2053** |
| ILMN_3006611 | NM_011945.2 | Map3k1 | mitogen-activated protein kinase kinase kinase | -1.1489 | **1.2052** |
| ILMN_2638114 | NM_008973.2 | Ptn | pleiotrophin | -1.0523 | **1.2052** |
| ILMN_2751935 | NM_013757.1 | Sytl4 | synaptotagmin-like 4 | -1.0507 | **1.2051** |
| ILMN_2916437 | NM_153793.1 | Rell2 | RELT-like 2 | -1.1256 | **1.2051** |
| ILMN_2752933 | NM_013689.4 | Tec | tec protein tyrosine kinase | -1.0762 | **1.2050** |
| ILMN_2774690 | XM_001004685.1 | LOC677317 | similar to NADP-dependent malic enzyme (NADP-ME) (Malic enzyme 1) | -1.0700 | **1.2045** |
| ILMN_2645793 | NM_026316.2 | Aldh3b1 | aldehyde dehydrogenase 3 family, member B1 | -1.0490 | **1.2045** |
| ILMN_2880467 | NM_026058.2 | Lass4 | ceramide synthase 4 | -1.1045 | **1.2044** |
| ILMN_1235124 | NM_001040426.2 | Thsd4 | thrombospondin, type I, domain containing 4 | -1.0862 | **1.2042** |
| ILMN_3162809 | NM_181074.4 | Lingo1 | leucine rich repeat and Ig domain containing 1 | -1.1175 | **1.2038** |
| ILMN_3084954 | NM_011570.2 | Tes | testis derived transcript | -1.0544 | **1.2037** |
| ILMN_2720186 | NM_010606.1 | Kcnj6 | potassium inwardly-rectifying channel, subfamily J, member 6 | -1.0539 | **1.2033** |
| ILMN_2763115 | NM_177613.2 | Cdc34 | cell division cycle 34 | -1.1534 | **1.2028** |
| ILMN_3152079 | NM_008767.2 | Slc22a18 | solute carrier family 22 (organic cation transporter), member 18 | -1.0669 | **1.2028** |
| ILMN_1249767 | NM_009378.2 | Thbd | thrombomodulin | 1.0000 | **1.2027** |
| ILMN_1239055 | NM_011723.2 | Xdh | xanthine dehydrogenase | 1.0181 | **1.2025** |
| ILMN_3161335 | NM_001034883.2 | Gm5475 | predicted gene 5475 | -1.1589 | **1.2025** |
| ILMN_1259822 | NM_080643.2 | Caskin2 | CASK-interacting protein 2 | -1.0421 | **1.2024** |
| ILMN_2660803 | NM_199195.1 | Bckdhb | branched chain keto acid dehydrogenase E1 subunit beta | -1.1004 | **1.2022** |
| ILMN_2831656 | NM_010140.1 | Epha3 | Eph receptor A3 | -1.1370 | **1.2019** |
| ILMN_2634564 | NM_026676.1 | Tsr3 | TSR3 20S rRNA accumulation | -1.0927 | **1.2019** |
| ILMN_2723891 | NM_172694.2 | Megf9 | multiple EGF-like-domains 9 | -1.1540 | **1.2012** |
| ILMN_2753422 | NM_010308.3 | Gnao1 | guanine nucleotide binding protein, alpha O | -1.0496 | **1.2011** |
| ILMN_2634338 | NM_134054.2 | Sptssa | serine palmitoyltransferase, small subunit A | 1.0643 | **1.2006** |
| ILMN_3001013 | NM_001009575.2 | Armcx5 | armadillo repeat containing, X-linked 5 | 1.2269 | **-1.2000** |
| ILMN_1224368 | NM_008323.1 | Idh3g | isocitrate dehydrogenase 3 (NAD+), gamma | 1.0936 | **-1.2002** |
| ILMN_2600763 | NM_008739.3 | Nsd1 | nuclear receptor-binding SET-domain protein 1 | 1.0986 | **-1.2002** |
| ILMN_2714956 | NM_173411.1 | BC030500 | cDNA sequence BC030500 | -1.0332 | **-1.2012** |
| ILMN_2873068 | NM_133892.3 | Lao1 | L-amino acid oxidase 1 | 1.1138 | **-1.2013** |
| ILMN_1232399 | NM_010298.5 | Glrb | glycine receptor, beta subunit | 1.1070 | **-1.2013** |
| ILMN_2671661 | NM_009591.2 | Aanat | arylalkylamine N-acetyltransferase | 1.1981 | **-1.2015** |
| ILMN_2843019 | NM_178253.2 | Klhdc1 | kelch domain containing 1 | 1.0366 | **-1.2015** |
| ILMN_2720925 | NM_025329.3 | Tctex1d2 | Tctex1 domain containing 2 | 1.1319 | **-1.2018** |
| ILMN_2686132 | NM_007398.3 | Ada | adenosine deaminase | 1.0172 | **-1.2021** |
| ILMN_2863601 | NM_011766.2 | Zfpm2 | zinc finger protein, multitype 2 | -1.0348 | **-1.2021** |
| ILMN_2725608 | NM_025288.2 | Stfa3 | stefin A3 | 1.1412 | **-1.2025** |
| ILMN_1232025 | NM_028036.3 | Tmco6 | transmembrane and coiled-coil domains 6 | 1.1282 | **-1.2026** |
| ILMN_1226334 | NM_025878 | Mrps18b | mitochondrial ribosomal protein S18B | 1.1227 | **-1.2027** |
| ILMN_2623155 | NM_177243.4 | Slc26a9 | solute carrier family 26, member 9 | 1.0856 | **-1.2028** |
| ILMN_3009589 | NM_207175.1 | Olfr239 | olfactory receptor 239 | -1.0217 | **-1.2028** |
| ILMN_2634537 | NM_030052.3 | Cox7b2 | cytochrome c oxidase subunit 7B2 | -1.0044 | **-1.2029** |
| ILMN_3098927 | NM_001003972.1 | Senp7 | SUMO1/sentrin specific peptidase 7 | 1.0635 | **-1.2031** |
| ILMN_1237546 | NM_145562.2 | Parm1 | prostate androgen-regulated mucin-like protein 1 | -1.0016 | **-1.2032** |
| ILMN_1216174 | NM_177460.3 | Parp16 | poly (ADP-ribose) polymerase family, member 16 | 1.0734 | **-1.2034** |
| ILMN_1239134 | NM_145100.3 | Lypd1 | Ly6/Plaur domain containing 1 | 1.1701 | **-1.2035** |
| ILMN_2671608 | NM_175012.2 | Grp | gastrin releasing peptide | 1.1684 | **-1.2038** |
| ILMN_3082773 | NM_001037177.1 | Nfatc2 | nuclear factor of activated T cells, cytoplasmic, calcineurin dependent 2 | -1.0032 | **-1.2043** |
| ILMN_2957617 | NM_029643.2 | Gpr172b | solute carrier protein 52, member 2 | 1.0699 | **-1.2043** |
| ILMN_1213858 | NM_026348.3 | Itgb3bp | integrin beta 3 binding protein (beta3-endonexin) | 1.1036 | **-1.2044** |
| ILMN_2510683 | NM_145441.3 | Ubxn2a | UBX domain protein 2A | 1.0756 | **-1.2044** |
| ILMN_2764136 | XM_001471994.1 | LOC100044363 | similar to N-cadherin | 1.1924 | **-1.2047** |
| ILMN_2675072 | NM_146036.1 | Ahsa1 | AHA1, activator of heat shock protein ATPase 1 | 1.0565 | **-1.2049** |
| ILMN_2631813 | NM_026053.1 | Gemin6 | gem nuclear organelle associated protein 6 | 1.0440 | **-1.2050** |
| ILMN_2735547 | NM_025658.4 | Ms4a4d | membrane-spanning 4-domains, subfamily A, member 4D | 1.0754 | **-1.2050** |
| ILMN_2619718 | NM_144820.3 | Ccdc28a | coiled-coil domain containing 28A | -1.0343 | **-1.2051** |
| ILMN_1226095 | NM_011011.1 | Oprk1 | opioid receptor, kappa 1 | -1.0510 | **-1.2054** |
| ILMN_2920503 | NM_009322.3 | Tbr1 | T-box brain gene 1 | 1.0281 | **-1.2056** |
| ILMN_2696537 | NM_178056.2 | Tm2d3 | TM2 domain containing 3 | 1.1005 | **-1.2056** |
| ILMN_2611439 | NM_008029.2 | Flt4 | FMS-like tyrosine kinase 4 | -1.0302 | **-1.2057** |
| ILMN_2958099 | NM_007421.1 | Adssl1 | adenylosuccinate synthetase like 1 | -1.0146 | **-1.2065** |
| ILMN_1224336 | NM_029035.2 | Spsb1 | splA/ryanodine receptor domain and SOCS box containing 1 | 1.2093 | **-1.2072** |
| ILMN_2758338 | NM_029502.1 | Cant1 | calcium activated nucleotidase 1 | 1.0497 | **-1.2075** |
| ILMN_2598834 | NM_175023.2 | Rbbp6 | retinoblastoma binding protein 6, ubiquitin ligase | 1.1342 | **-1.2076** |
| ILMN_2860656 | NM_001081050.1 | Pard3b | par-3 family cell polarity regulator beta | 1.0002 | **-1.2078** |
| ILMN_3160561 | NM_001039122.1 | Defb25 | defensin beta 25 | 1.1255 | **-1.2081** |
| ILMN_2782652 | NM_172902.2 | Agbl1 | ATP/GTP binding protein-like 1 | 1.1914 | **-1.2083** |
| ILMN_1252602 | XM_001480443.1 | LOC100048622 | similar to EF-hand Ca2+ binding protein p22 | 1.1780 | **-1.2089** |
| ILMN_2590164 | NM_153163.3 | Cadps2 | Ca2+-dependent activator protein for secretion 2 | 1.0892 | **-1.2098** |
| ILMN_3106619 | NM_009217.2 | Sstr2 | somatostatin receptor 2 | -1.0120 | **-1.2100** |
| ILMN_2917221 | NM_016903.2 | Esd | esterase D/formylglutathione hydrolase | 1.0486 | **-1.2101** |
| ILMN_2679695 | NM_178051.3 | Mterfd2 | mitochondrial transcription termination factor 4 | 1.0943 | **-1.2102** |
| ILMN_2619179 | NM_028125.2 | Zbtb46 | zinc finger and BTB domain containing 46 | -1.0256 | **-1.2104** |
| ILMN_1219556 | NM_029256.3 | Ccdc83 | coiled-coil domain containing 83 | 1.0857 | **-1.2108** |
| ILMN_2958382 | NM_007690.1 | Chd1 | chromodomain helicase DNA binding protein 1 | 1.0227 | **-1.2109** |
| ILMN_2827080 | NM_013731.1 | Sgk2 | serum/glucocorticoid regulated kinase 2 | 1.1075 | **-1.2113** |
| ILMN_2717569 | NM_138668.1 | Ufsp2 | UFM1-specific peptidase 2 | 1.0483 | **-1.2118** |
| ILMN_1226801 | NM_172817.1 | Zfp647 | zinc finger protein 647 | 1.1077 | **-1.2118** |
| ILMN_3071515 | NM_025988.2 | Acbd4 | acyl-Coenzyme A binding domain containing 4 | 1.1382 | **-1.2118** |
| ILMN_1253649 | NM_053128.2 | Pcdhb3 | protocadherin beta 3 | 1.0532 | **-1.2120** |
| ILMN_2785454 | NM_178213.3 | Hist2h2ab | histone cluster 2, H2ab | 1.1256 | **-1.2120** |
| ILMN_2780915 | NM_145404.1 | Prmt7 | protein arginine N-methyltransferase 7 | 1.0522 | **-1.2122** |
| ILMN_2751653 | NM_026164.2 | Pnpla8 | patatin-like phospholipase domain containing 8 | 1.0509 | **-1.2127** |
| ILMN_2600053 | NM_024211.2 | Slc25a11 | solute carrier family 25 (mitochondrial carrier oxoglutarate carrier), member 11 | 1.1025 | **-1.2130** |
| ILMN_2445989 | NM_029979.1 | Trim35 | tripartite motif-containing 35 | 1.0163 | **-1.2136** |
| ILMN_1230396 | NM_178404.2 | Zc3h6 | zinc finger CCCH type containing 6 | 1.0782 | **-1.2136** |
| ILMN_2706531 | NM_198656.1 | Cdh26 | cadherin-like 26 | 1.0062 | **-1.2137** |
| ILMN_2795792 | NM_028053.1 | Tmem38b | transmembrane protein 38B | 1.0561 | **-1.2139** |
| ILMN_2707188 | NM_172688.2 | Map3k7 | mitogen-activated protein kinase kinase kinase 7 | 1.1528 | **-1.2140** |
| ILMN_2965621 | NM_175455.2 | Ankrd34b | ankyrin repeat domain 34B | 1.0561 | **-1.2140** |
| ILMN_1218540 | NM_173751.3 | Ilvbl | ilvB (bacterial acetolactate synthase)-like | 1.1199 | **-1.2144** |
| ILMN_2729513 | NM_016956.2 | Hbb-b2 | hemoglobin, beta adult minor chain | 1.0081 | **-1.2144** |
| ILMN_2453565 | NM_026112.3 | Zfp606 | zinc finger protein 606 | 1.2282 | **-1.2148** |
| ILMN_1223300 | XM_980152.1 | Fam208b | family with sequence similarity 208, member B | 1.0233 | **-1.2166** |
| ILMN_2950594 | NM_008667.2 | Nab1 | Ngfi-A binding protein 1 | 1.1255 | **-1.2167** |
| ILMN_1249529 | NM_026385.4 | Pllp | plasma membrane proteolipid | 1.1484 | **-1.2171** |
| ILMN_2901801 | NM_008384.1 | Inpp1 | inositol polyphosphate-1-phosphatase | 1.0506 | **-1.2172** |
| ILMN_2846297 | NM_178399.2 | Vxn | vexin | 1.0896 | **-1.2174** |
| ILMN_1217839 | NM_138742.1 | Nap1l3 | nucleosome assembly protein 1-like 3 | 1.1086 | **-1.2175** |
| ILMN_2650475 | NM_026516.2 | Tmem178 | transmembrane protein 178 | 1.0419 | **-1.2175** |
| ILMN_2625047 | NM_175286.3 | Tprn | taperin | 1.1393 | **-1.2176** |
| ILMN_2749052 | NM_019511.3 | Ramp3 | receptor (calcitonin) activity modifying protein 3 | 1.0155 | **-1.2177** |
| ILMN_1235689 | NM_001039389.1 | Wdr37 | WD repeat domain 37 | 1.0899 | **-1.2178** |
| ILMN_1214515 | NM_019729.2 | Usp8 | ubiquitin specific peptidase 8 | -1.0131 | **-1.2178** |
| ILMN_3055230 | NM_001039655.1 | Rasgrf1 | RAS protein-specific guanine nucleotide-releasing factor 1 | -1.1028 | **-1.2181** |
| ILMN_2898506 | NM_001018087.1 | Ldoc1 | Leucine Zipper Down-regulated in Cancer-1; regulator of NFKB signaling | 1.0501 | **-1.2182** |
| ILMN_2664491 | NM_026386 | Snx2 | sorting nexin 2 | 1.0595 | **-1.2184** |
| ILMN_2829636 | NM_013760.3 | Dnajb9 | DnaJ heat shock protein family (Hsp40) member B9 | 1.1393 | **-1.2186** |
| ILMN_2712756 | XR_035722.1 | Phxr5 | per-hexamer repeat gene 5 | 1.0532 | **-1.2189** |
| ILMN_3027287 | NM_027406.1 | Aldh1l1 | aldehyde dehydrogenase 1 family, member L1 | 1.1636 | **-1.2192** |
| ILMN_2900016 | NM_172856.1 | Lass6 | transcription factor protein | 1.1459 | **-1.2192** |
| ILMN_1246464 | NM_177383.2 | Gpr21 | G protein-coupled receptor 21 | -1.1227 | **-1.2194** |
| ILMN_3063644 | NM_018804.3 | Syt11 | synaptotagmin XI | 1.1242 | **-1.2194** |
| ILMN_2656645 | NM_145923.4 | Rell1 | RELT-like 1 | -1.0115 | **-1.2198** |
| ILMN_2613313 | NM_177727.4 | Lsm14b | LSM family member 14B | 1.0232 | **-1.2202** |
| ILMN_2986172 | NM_026539.1 | Chd1l | chromodomain helicase DNA binding protein 1-like | 1.1599 | **-1.2202** |
| ILMN_2914507 | NM_001033305.1 | Ndufb6 | NADH:ubiquinone oxidoreductase subunit B6 | 1.1139 | **-1.2203** |
| ILMN_1256281 | NM_025332.2 | Gtpbp8 | GTP-binding protein 8 (putative) | 1.2067 | **-1.2203** |
| ILMN_2891176 | NM_008618.2 | Mdh1 | malate dehydrogenase 1, NAD (soluble) | 1.2186 | **-1.2206** |
| ILMN_2890069 | NM_001033233.1 | Tmprss11a | transmembrane protease, serine 11a | 1.0369 | **-1.2208** |
| ILMN_2938047 | NM_023794.2 | Etv5 | ets variant 5 | 1.0033 | **-1.2209** |
| ILMN_2958016 | NM_028058.1 | Fundc1 | FUN14 domain containing 1 | 1.0368 | **-1.2210** |
| ILMN_3095356 | NM_001025085.1 | Gm5797 | predicted gene 5797 | 1.2794 | **-1.2217** |
| ILMN_1237174 | NM_198093.2 | Elmo1 | engulfment and cell motility 1 | 1.0844 | **-1.2225** |
| ILMN_2907499 | NM_001033463.1 | Tatdn2 | TatD DNase domain containing 2 | 1.0633 | **-1.2231** |
| ILMN_2619767 | NM_145978.1 | Pdlim2 | PDZ and LIM domain 2 | 1.2338 | **-1.2234** |
| ILMN_1245472 | NM_007423.3 | Afp | alpha fetoprotein | 1.1031 | **-1.2235** |
| ILMN_3146287 | NM_001081175.1 | Itpkb | inositol 1,4,5-trisphosphate 3-kinase B | 1.1627 | **-1.2242** |
| ILMN_2675268 | NM_172715.3 | Agpat9 | 1-acylglycerol-3-phosphate O-acyltransferase 9 | -1.0075 | **-1.2243** |
| ILMN_2754148 | NM_001048054.1 | Dusp16 | dual specificity phosphatase 16 | 1.0076 | **-1.2245** |
| ILMN_3037758 | NM_001081289.1 | Fam217b | family with sequence similarity 217, member B | 1.0975 | **-1.2250** |
| ILMN_3153285 | NM_010161.3 | Evi2a | ecotropic viral integration site 2a | 1.0903 | **-1.2252** |
| ILMN_2605566 | NM_001085408.1 | Sdccag3 | serologically defined colon cancer antigen 3 | 1.0324 | **-1.2255** |
| ILMN_2596998 | NM_027990.3 | Lypd6b | LY6/PLAUR domain containing 6B | 1.2085 | **-1.2263** |
| ILMN_2909782 | NM_025846.1 | Rras2 | related RAS viral (r-ras) oncogene 2 | 1.3220 | **-1.2265** |
| ILMN_1249095 | NM_001007266.1 | Taar2 | trace amine-associated receptor 2 | 1.1969 | **-1.2265** |
| ILMN_2688383 | NM_138747.1 | Nol1 | NO synthase-like protein | 1.2135 | **-1.2271** |
| ILMN_2724465 | NM_007720.2 | Ccr8 | chemokine (C-C motif) receptor 8 | 1.0802 | **-1.2273** |
| ILMN_2610435 | NM_020584.1 | Terf2ip | telomeric repeat binding factor 2, interacting protein | 1.0364 | **-1.2276** |
| ILMN_2937425 | NM_029930.1 | Tcaf1 | TRPM8 channel-associated factor 1 | -1.0197 | **-1.2277** |
| ILMN_2801385 | NM_053190.1 | S1pr5 | sphingosine-1-phosphate receptor 5 | 1.0978 | **-1.2278** |
| ILMN_2598420 | XM_619423.4 | Rbm16 | SR-related CTD-associated factor 8 | 1.1928 | **-1.2279** |
| ILMN_2659503 | NM_019707.4 | Cdh13 | cadherin 13 | 1.0968 | **-1.2279** |
| ILMN_2491859 | NM_053273.1 | Ttyh2 | tweety family member 2 | 1.2267 | **-1.2280** |
| ILMN_2678641 | NM_007959.1 | Etv2 | ets variant 2 | 1.1339 | **-1.2281** |
| ILMN_2923874 | NM_001080945.1 | Nanogpd | Nanog homeobox | 1.1075 | **-1.2283** |
| ILMN_2593662 | NM_026000.2 | Psmd9 | proteasome (prosome, macropain) 26S subunit, non-ATPase, 9 | 1.0478 | **-1.2284** |
| ILMN_1226662 | NM_173419.1 | Dleu7 | deleted in lymphocytic leukemia, 7 | 1.0073 | **-1.2290** |
| ILMN_2814865 | NM_027455.1 | Qpct | glutaminyl-peptide cyclotransferase (glutaminyl cyclase) | 1.0047 | **-1.2292** |
| ILMN_2617930 | NM_021483.2 | Pex5l | peroxisomal biogenesis factor 5-like | 1.1718 | **-1.2294** |
| ILMN_2607253 | NM_011029.3 | Rpsa | ribosomal protein SA | 1.2301 | **-1.2295** |
| ILMN_2678012 | NM_028127 | Frmd6 | FERM domain containing 6 | 1.0434 | **-1.2298** |
| ILMN_1254242 | NM_020522.1 | Vom1r92 | vomeronasal 1 receptor 92 | 1.1166 | **-1.2299** |
| ILMN_2970691 | NM_019489.2 | Ppie | peptidylprolyl isomerase E | 1.0848 | **-1.2302** |
| ILMN_1239002 | NM_013625.2 | Pafah1b1 | platelet-activating factor acetylhydrolase, isoform 1b, subunit 1 | 1.2183 | **-1.2307** |
| ILMN_3161282 | NM_023047.2 | Dpysl5 | dihydropyrimidinase-like 5 | 1.1943 | **-1.2307** |
| ILMN_2909105 | NM_027773.1 | Fam57a | family with sequence similarity 57, member A | 1.1389 | **-1.2311** |
| ILMN_2711523 | NM_008174.2 | Grm8 | glutamate receptor, metabotropic 8 | 1.0381 | **-1.2313** |
| ILMN_2610891 | NM_144906.1 | Sgip1 | SH3-domain GRB2-like (endophilin) interacting protein 1 | 1.1131 | **-1.2314** |
| ILMN_2686069 | NM_013755.2 | Gyg | glycogenin | 1.1439 | **-1.2316** |
| ILMN_3117714 | NM_001039214.3 | Mex3c | mex3 RNA binding family member C | -1.0661 | **-1.2316** |
| ILMN_1241035 | NM_133839.2 | Mmadhc | methylmalonic aciduria (cobalamin deficiency) cblD type, with homocystinuria | 1.0180 | **-1.2330** |
| ILMN_2615741 | NM_146200 | Eif3s8 | proteasome component region PCI domain-containing protein | 1.0579 | **-1.2334** |
| ILMN_2738972 | NM_016877.3 | Cnot4 | CCR4-NOT transcription complex, subunit 4 | -1.0153 | **-1.2334** |
| ILMN_2980157 | NM_030166.1 | Galntl2 | polypeptide N-acetylgalactosaminyltransferase 15 | 1.1297 | **-1.2340** |
| ILMN_2640082 | NM_023179.3 | Atp6v1g2 | ATPase, H+ transporting, lysosomal V1 subunit G2 | 1.0051 | **-1.2342** |
| ILMN_2883561 | NM_013677.1 | Surf1 | surfeit gene 1 | 1.1393 | **-1.2357** |
| ILMN_1231794 | NM_011857.2 | TENM1 | teneurin transmembrane protein 1 | 1.2333 | **-1.2363** |
| ILMN_2679871 | NM_007735.1 | Col4a4 | collagen, type IV, alpha 4 | 1.1532 | **-1.2375** |
| ILMN_2606498 | NM_145391.1 | Tapbpl | TAP binding protein-like | -1.0002 | **-1.2378** |
| ILMN_2965669 | NM_001081642.1 | Xlr4a | X-linked lymphocyte-regulated 4A | -1.0426 | **-1.2380** |
| ILMN_2835227 | NM_001033462.1 | Gm1070 | predicted gene 1070 | 1.1818 | **-1.2381** |
| ILMN_2619249 | NM_172926.2 | Snx14 | sorting nexin 14 | 1.0392 | **-1.2387** |
| ILMN_2783403 | NM_011203.2 | Ptpn12 | protein tyrosine phosphatase, non-receptor type 12 | 1.1131 | **-1.2388** |
| ILMN_1257115 | NM_022323 | Moap1 | modulator of apoptosis 1 | 1.1626 | **-1.2393** |
| ILMN_2616214 | NM_146276.1 | Olfr1394 | olfactory receptor 1394 | 1.2400 | **-1.2403** |
| ILMN_2744683 | NM_007547.2 | Sirpa | signal-regulatory protein alpha | 1.1267 | **-1.2404** |
| ILMN_2752327 | NM_145962.2 | Pank3 | pantothenate kinase 3 | 1.0129 | **-1.2408** |
| ILMN_3075157 | NM_172605.2 | Tdrd3 | tudor domain containing 3 | 1.0189 | **-1.2408** |
| ILMN_3157232 | NM_001003916.1 | Zc4h2 | zinc finger, C4H2 domain containing | 1.0773 | **-1.2415** |
| ILMN_2804444 | NM_001013753.1 | Pcdh17 | protocadherin 17 | -1.0241 | **-1.2422** |
| ILMN_2742382 | NM_207142.1 | Olfr1036 | olfactory receptor 1036 | 1.0942 | **-1.2422** |
| ILMN_2624676 | NM_022982.2 | Rtn4r | reticulon 4 receptor | 1.1604 | **-1.2429** |
| ILMN_2642411 | NM_173187.2 | Relch | RAB11 binding and LisH domain, coiled-coil and HEAT repeat containing | 1.0597 | **-1.2431** |
| ILMN_2778279 | NM_008036.2 | Fosb | FBJ osteosarcoma oncogene B | -1.1218 | **-1.2432** |
| ILMN_2649709 | NM_007960.1 | Etv1 | ets variant 1 | -1.0680 | **-1.2432** |
| ILMN_1258734 | NM_023653.4 | Wnt2 | wingless-type MMTV integration site family, member 2 | -1.0204 | **-1.2444** |
| ILMN_1217590 | NM_009266.3 | Sephs2 | selenophosphate synthetase 2 | 1.0698 | **-1.2444** |
| ILMN_1250195 | NM_008681.2 | Ndrg1 | protein phosphatase 1, regulatory inhibitor subunit 14A | 1.1135 | **-1.2445** |
| ILMN_2830979 | NM_144872.1 | Eml3 | echinoderm microtubule associated protein like 3 | 1.1347 | **-1.2446** |
| ILMN_2729953 | NM_011151.1 | Ppm1b | protein phosphatase 1B, magnesium dependent, beta isoform | -1.0649 | **-1.2453** |
| ILMN_2938820 | NM_008691.2 | Nefm | neurofilament, medium polypeptide | -1.0116 | **-1.2456** |
| ILMN_2659824 | NM_026731.3 | Ppp1r14a | protein phosphatase 1, regulatory inhibitor subunit 14A | 1.1843 | **-1.2463** |
| ILMN_2701701 | NM_019535.2 | Sh3gl2 | SH3-domain GRB2-like 2 | 1.0761 | **-1.2494** |
| ILMN_2602687 | NM_011284.3 | Rpa2 | replication protein A2 | 1.1299 | **-1.2502** |
| ILMN_1239294 | NM_026772.1 | Cdc42ep2 | CDC42 effector protein (Rho GTPase binding) 2 | 1.1325 | **-1.2506** |
| ILMN_2620803 | NM_026347.3 | Iah1 | isoamyl acetate-hydrolyzing esterase 1 homolog | 1.1922 | **-1.2507** |
| ILMN_2699509 | NM_177111.3 | Ccdc66 | coiled-coil domain containing 66 | 1.0926 | **-1.2508** |
| ILMN_2895630 | NM_020570.2 | Xrcc2 | X-ray repair complementing defective repair in Chinese hamster cells 2 | 1.1317 | **-1.2542** |
| ILMN_2758545 | NM_027998.3 | Cldn23 | claudin 23 | 1.2340 | **-1.2548** |
| ILMN_2667829 | NM_008859.1 | Prkcq | protein kinase C, theta | 1.1892 | **-1.2552** |
| ILMN_2754859 | NM_013924.1 | Abt1 | activator of basal transcription 1 | 1.0932 | **-1.2564** |
| ILMN_1241827 | NM_133891.2 | Slc44a1 | solute carrier family 44, member 1 | 1.1901 | **-1.2574** |
| ILMN_2643049 | NM_175140.3 | Chst8 | carbohydrate sulfotransferase 8 | 1.0746 | **-1.2578** |
| ILMN_2694758 | NM_133766.3 | Efr3a | EFR3 homolog A | 1.0396 | **-1.2588** |
| ILMN_2620827 | NM_144946.3 | Neto1 | neuropilin (NRP) and tolloid (TLL)-like 1 | 1.0709 | **-1.2594** |
| ILMN_2589803 | NM_031394.1 | Sytl2 | synaptotagmin-like 2 | 1.0637 | **-1.2598** |
| ILMN_3151396 | NM_001080817.1 | Prdm10 | PR domain containing 10 | 1.0601 | **-1.2599** |
| ILMN_2672509 | NM_173395.2 | Fam132b | family with sequence similarity 132, member B | -1.0176 | **-1.2633** |
| ILMN_1230152 | NM_172845.1 | Adamts4 | a disintegrin-like and metallopeptidase (reprolysin type) with thrombospondin type 1 motif, 4 | 1.0998 | **-1.2636** |
| ILMN_2818895 | NM_008180.1 | Gss | glutathione synthetase | 1.0990 | **-1.2642** |
| ILMN_2593694 | NM_176920.3 | Lrtm1 | leucine-rich repeats and transmembrane domains 1 | 1.1872 | **-1.2651** |
| ILMN_2428545 | NM_021406.2 | Trem1 | triggering receptor expressed on myeloid cells 1 | 1.1102 | **-1.2659** |
| ILMN_2592620 | NM_019566.3 | Rhog | ras homolog family member G | 1.1953 | **-1.2659** |
| ILMN_1243370 | NM_028057.2 | Cyb5r1 | cytochrome b5 reductase 1 | 1.2644 | **-1.2661** |
| ILMN_3150366 | NM_177652.2 | Ryr3 | ryanodine receptor 3 | 1.1270 | **-1.2673** |
| ILMN_2640415 | NM_170756.2 | Spata2 | spermatogenesis associated 2 | 1.1080 | **-1.2676** |
| ILMN_2852067 | NM_026070.1 | Ccdc53 | coiled-coil domain containing 53 | 1.1094 | **-1.2676** |
| ILMN_3116570 | NM_024221.3 | Pdhb | pyruvate dehydrogenase (lipoamide) beta | 1.1789 | **-1.2678** |
| ILMN_2800446 | NM_008298.2 | Dnaja1 | DnaJ heat shock protein family (Hsp40) member A1 | -1.0114 | **-1.2678** |
| ILMN_1253062 | NM_173767.2 | Insc | INSC spindle orientation adaptor protein | 1.2150 | **-1.2680** |
| ILMN_1257097 | NM_009923.1 | Cnp | 2',3'-cyclic nucleotide 3' phosphodiesterase | 1.1997 | **-1.2686** |
| ILMN_2732601 | NM_028710.2 | Arsg | arylsulfatase G | 1.2568 | **-1.2695** |
| ILMN_1229397 | NM_009199.2 | Slc1a1 | EAAT3, solute carrier family 1 (neuronal/epithelial high affinity glutamate transporter, system Xag), member 1 | 1.1002 | **-1.2710** |
| ILMN_1214664 | NM_001038592.1 | Glrx2 | glutaredoxin 2 (thioltransferase) | 1.1013 | **-1.2714** |
| ILMN_2697220 | NM_010216.1 | Figf | c-fos induced growth factor | 1.3914 | **-1.2719** |
| ILMN_2933022 | NM_013746.1 | Plekhb1 | pleckstrin homology domain containing, family B (evectins) member 1 | 1.2144 | **-1.2764** |
| ILMN_1244864 | NM_026450.2 | Zfp169 | zinc finger protein 169 | 1.1537 | **-1.2768** |
| ILMN_2628657 | NM_027439.2 | Atp6ap2 | ATPase, H+ transporting, lysosomal accessory protein 2 | 1.0577 | **-1.2777** |
| ILMN_2932508 | NM_130457.2 | Cntnap4 | contactin associated protein-like 4 | 1.1154 | **-1.2780** |
| ILMN_2840213 | NM_009964.1 | Cryab | crystallin, alpha B | 1.0441 | **-1.2788** |
| ILMN_2670662 | NM_144901.2 | Csde1 | cold shock domain containing E1, RNA binding | 1.0248 | **-1.2790** |
| ILMN_2750248 | NM_008634.1 | Mtap1b | microtubule-associated protein 1B | 1.0530 | **-1.2812** |
| ILMN_2809656 | NM_001033529.1 | Tulp4 | tubby like protein 4 | 1.1650 | **-1.2814** |
| ILMN_2911248 | NM_013829.2 | Plcb4 | phospholipase C, beta 4 | -1.0465 | **-1.2840** |
| ILMN_1230413 | NM_017382.4 | Rab11a | RAB11A, member RAS oncogene family | 1.2155 | **-1.2863** |
| ILMN_2589792 | NM_011600.2 | Tle4 | transducin-like enhancer of split 4 | 1.0836 | **-1.2876** |
| ILMN_2638186 | NM_144939.2 | Frs3 | fibroblast growth factor receptor substrate 3 | 1.0964 | **-1.2924** |
| ILMN_2505307 | NM_013771.4 | Yme1l1 | YME1-like 1 (S. cerevisiae) | 1.1117 | **-1.2955** |
| ILMN_2852380 | NM_011899.3 | Srp54 | signal recognition particle 54 | -1.0021 | **-1.3023** |
| ILMN_2521340 | NM_013696.2 | Trhr | thyrotropin releasing hormone receptor | 1.2033 | **-1.3039** |
| ILMN_1252953 | NM_019626.3 | Cbln1 | cerebellin 1 precursor protein | 1.2265 | **-1.3041** |
| ILMN_2716602 | NM_010708.1 | Lgals9 | lectin, galactose binding, soluble 9 | 1.1714 | **-1.3136** |
| ILMN_2702233 | NM_009831.2 | Ccng1 | cyclin G1 | 1.0498 | **-1.3178** |
| ILMN_2729364 | NM_183427.4 | Glra2 | glycine receptor, alpha 2 subunit | 1.1188 | **-1.3225** |
| ILMN_2932692 | NM_080433.1 | Fezf2 | Fez family zinc finger 2 | 1.1520 | **-1.3228** |
| ILMN_1217225 | NM_025911.2 | Ccdc91 | coiled-coil domain containing 91 | 1.2467 | **-1.3242** |
| ILMN_2857947 | NM_178872.3 | Trim36 | tripartite motif-containing 36 | 1.1982 | **-1.3266** |
| ILMN_2737200 | NM_010777.3 | Mbp | myelin basic protein | 1.1464 | **-1.3287** |
| ILMN_2766894 | NM_177304.3 | Enpp6 | ectonucleotide pyrophosphatase/phosphodiesterase 6 | 1.1971 | **-1.3311** |
| ILMN_1246139 | NM_008770.2 | Cldn11 | claudin 11 | 1.2289 | **-1.3331** |
| ILMN_1222084 | NM_080726.3 | Rem2 | rad and gem related GTP binding protein 2 | 1.1150 | **-1.3335** |
| ILMN_2703138 | NM_172383.2 | Tmem125 | transmembrane protein 125 | 1.2630 | **-1.3361** |
| ILMN_2656827 | XM_001473682.1 | LOC100048832 | similar to branched chain aminotransferase 1, cytosolic | 1.1367 | **-1.3440** |
| ILMN_1228582 | NM_138652.1 | Atp12a | ATPase, H+/K+ transporting, nongastric, alpha polypeptide | 1.1116 | **-1.3489** |
| ILMN_1237021 | NM_010758.2 | Mag | myelin-associated glycoprotein | 1.3008 | **-1.3490** |
| ILMN_2922321 | NM_080853.2 | Slc17a6 | solute carrier family 17 (sodium-dependent inorganic phosphate cotransporter), member 6 | 1.1492 | **-1.3578** |
| ILMN_2720976 | NM_011348.2 | Sema3e | sema domain, immunoglobulin domain (Ig), short basic domain, secreted, (semaphorin) 3E | 1.2246 | **-1.3601** |
| ILMN_2824889 | NM_153520.1 | Opalin | oligodendrocytic myelin paranodal and inner loop protein | 1.2952 | **-1.3676** |
| ILMN_2750515 | NM_010234.2 | Fos | FBJ osteosarcoma oncogene | -1.3532 | **-1.3697** |
| ILMN_2662264 | NM_029815.1 | Bcas1 | breast carcinoma amplified sequence 1 | 1.2836 | **-1.3880** |
| ILMN_1223628 | NM_008614.2 | Mobp | myelin-associated oligodendrocytic basic protein | 1.3329 | **-1.3956** |
| ILMN_2728682 | NM_178774.3 | Prr18 | proline rich 18 | 1.2619 | **-1.4026** |
| ILMN_2778438 | NM_177164.3 | Vwc2l | von Willebrand factor C domain-containing protein 2-like | 1.1717 | **-1.4050** |
| ILMN_1224029 | NM_010762.4 | Mal | myelin and lymphocyte protein, T cell differentiation protein | 1.3887 | **-1.4174** |
| ILMN_2685751 | NM_212452.1 | Rxfp1 | relaxin/insulin-like family peptide receptor 1 | 1.1525 | **-1.4177** |
| ILMN_2609052 | NM_026556.3 | Dynll2 | dynein light chain LC8-type 2 | -1.5338 | **-1.4263** |
| ILMN_2597606 | NM_175452.3 | Gjc2 | gap junction protein, gamma 2 | 1.2379 | **-1.4301** |
| ILMN_2615034 | NM_010814.2 | Mog | myelin oligodendrocyte glycoprotein | 1.3246 | **-1.4749** |
| ILMN_2485323 | NM_133977.2 | Trf | transferrin | 1.2178 | **-1.4769** |
| ILMN_2746783 | NM_178086.2 | Fa2h | fatty acid 2-hydroxylase | 1.3510 | **-1.5078** |
| ILMN_1239557 | NM_011674.4 | Ugt8a | UDP galactosyltransferase 8A | 1.2296 | **-1.5102** |
| ILMN_1234698 | NM_027533.2 | Tspan2 | tetraspanin 2 | 1.2321 | **-1.5174** |
| ILMN_2595597 | NM_028390.2 | Anln | anillin, actin binding protein | 1.2537 | **-1.6246** |
| ILMN_2443330 | NM_013697.3 | Ttr | Transthyretin | 2.0508 | **-1.7414** |
