# Supplementary material for: Behavioral appraisal by implementing a short sequence of stress resolves adaptively changed stress gains
Source: Research Square preprint supplement (doi:10.21203/rs.3.rs-90131/v1), 2020-10-20
Supplement: Supplementary file 2 [file 72a9e6737fc3211142544746.docx]

| Supplementary Table 1. Weak restraint stress or low-dose glucocorticoid induces *c-Fos* expression differentially in various brain regions. | | | | | | | | | | |
| --- | --- | --- | --- | --- | --- | --- | --- | --- | --- | --- |
|  | Brain region | | CRST  (CON) | CRST  +S5 | CRST  +S15 | CRST+S5(x8d) | CRST  +S15(x8d) | CRST  +CORT(0.1)  (x8d) | CRST  +CORT(0.5)  (x8d) | CRST  +CORT(1.0)  (x8d) |
|  | Prelimbic cortex | PL | - | + | +++ | ++++ | +++ | ++ | +++ | ++++ |
| Infralimbic cortex | IL | - | - | +++ | ++++ | +++ | +++ | ++++ | ++++ |
| Medial orbital cortex | MO | - | - | ++ | ++++ | + | ++ | +++ | +++ |
| Dorsal pendubcular cortex | DP | - | ++ | ++ | +++ | + | +++ | +++ | ++++ |
|  | Anterior cingulate cortex | ACC | - | + | ++ | ++++ | ++ | + | +++ | +++ |
| Dorsolateral septal nucleus | dLS | - | - | + | +++ | ++ | ++ | ++ | ++ |
| Intermediolateral septal nucleus | iLS | - | - | - | - | - | - | - | - |
| Ventrolateral septal nucleus | vLS | - | ++ | +++ | +++ | +++ | + | + | ++ |
| Dorsomedial striatum | dmSTR | - | - | + | +++ | ++ | +++ | +++ | +++ |
| Dorsolateral striatum | dlSTR | - | - | - | - | - | + | ++ | ++ |
| Ventromedial striatum | vmSTR | - | ++ | + | +++ | +++ | +++ | +++ | +++ |
| Ventrolateral striatum | vlSTR | - | - | - | - | - | +++ | +++ | +++ |
| Claustrum | Cl | - | ++ | +++ | ++++ | +++ | +++ | +++ | +++ |
| Insula | INS | - | ++ | +++ | ++ | +++ | + | + | + |
| Piriform cortex | Pir | - | + | - | + | + | + | + | + |
| Primary motor cortex | M1 | - | - | + | + | + | + | + | + |
| Primary somatosensory cortex | S1 | - | - | - | - | - | ++ | ++ | ++ |
| Nucleus accumbens (core) | NAcc | - | +++ | +++ | +++ | +++ | ++++ | ++++ | ++++ |
| Nucleus accumbens (medial shell) | NAc mSh | + | +++ | ++++ | ++++ | ++++ | ++++ | ++++ | ++++ |
| Nucleus accumbens (ventral shell) | NAc vSh | - | + | + | + | ++ | ++ | ++ | +++ |
|  | Septofimbrial nucleus | Sfi | - | - | - | + | - | ++ | + | + |
| Bed nucleus of stria terminalis (dorsal) | dBNST | - | - | + | ++ | + | + | ++ | ++ |
| Bed nucleus of stria terminalis (ventral) | vBNST | - | - | - | + | + | + | + | + |
| Medial preoptic nucleus | MPO | + | + | + | - | + | + | + | + |
|  | Mediodorsal thalamic nucleus | MD | + | - | - | + | - | + | + | ++ |
| Anterior paraventricular thalamic nucleus | PVA | +++ | +++ | +++ | ++++ | ++ | +++ | ++++ | ++++ |
| Reuniens thalamic nucleus | Re | - | - | - | - | + | + | - | + |
| Hypothalamic  pararventricular nucleus | PVN | + | + | + | +++ | + | ++ | ++ | ++ |
| Anterior hypothalamic area (central) | AHC | + | + | ++ | ++ | + | + | ++ | ++ |
| Suprachiasmatic nucleus | Scn | +++ | ++++ | +++ | ++++ | ++++ | +++++ | +++++ | +++++ |
| Reticular nucleus (prethalamus) | Rt | - | - | - | - | - | - | - | - |
| Globus pallidus | GP | - | - | - | - | - | - | - | - |
|  | Retrosplenial granular cortex | RSG | - | + | + | +++ | + | ++++ | ++++ | ++++ |
| Dorsal Hippocampus (DG) | dDG | + | ++ | + | +++ | + | +++ | +++ | +++ |
| Dorsal Hippocampus (CA3) | dCA3 | - | - | - | - | - | - | + | - |
| Dorsal Hippocampus (CA1) | dCA1 | - | + | - | +++ | + | ++ | ++ | ++ |
| Medial Habenula | MHb | - | - | - | - | - | - | - | - |
| Lateral Habenula | LHb | - | - | - | - | - | - | - | - |
| Paraventricular thalamic nucleus | PV | ++ | ++ | ++ | ++++ | ++ | ++++ | +++ | +++ |
| Dorsomedial hypothalamic nucleus | DMH | + | + | + | + | + | ++ | ++ | ++ |
| Ventromedial hypothalamic nucleus | VMH | - | - | - | - | - | - | + | + |
| Arcuate hypothalamic nucleus | Arc | - | + | - | - | ++ | - | - | - |
| Zona incerta | ZI | - | - | - | + | + | + | + | ++ |
| Lateral hypothalamus | LH | - | - | - | + | - | + | + | ++ |
| Basolateral amygdala | BLA | - | +++ | +++ | +++ | +++ | +++ | +++ | ++++ |
| Amygdala (central nuclei) | CeA | - | + | + | ++ | + | ++ | ++ | +++ |
| Basomedial amygdaloid nucleus (posterior) | BMP | - | ++ | ++ | +++ | ++ | +++ | +++ | +++ |
| Medial amygdaloid nucleus | MeP | - | + | + | ++ | + | ++ | +++ | +++ |
| Dorsal endopiroform claustrum | Den | - | ++ | ++ | ++ | ++ | ++ | +++ | +++ |
|  | Ventral Hippocampus (DG) | vDG | + | + | + | +++ | ++ | +++ | +++ | +++ |
| Ventral Hippocampus (CA1) | vCA1 | - | ++ | +++ | ++++ | +++ | +++ | ++++ | ++++ |
| Superior colliculus | SC | - | - | - | ++ | - | ++ | ++ | +++ |
| Periaqueductal gray | PAG | - | - | - | +++ | + | + | ++ | +++ |
| Geniculate nucleus | GV | - | - | - | - | - | - | + | - |
| Ventral tegmental area | VTA | - | - | - | + | - | - | - | + |
| Substantia nigra | SN | - | - | - | - | - | - | - | - |
| Retromammillary nucleus | RM | - | - | - | - | - | + | + | ++ |
| PL; Prelimbic cortex, IL; Infralimbic cortex, MO; Medial orbital cortex, DP; Dorsal penduncular cortex, ACC; Anterior cingulate cortex, dLS; (dorsal) Lateral septal nucleus; iLS; (intermediated) Lateral septal nucleus, vLS; (ventral) Lateral septal nucleus; dmSTR; (dorsomedial) Striatum, dlSTR; (dorsolateral) Striatum, vmSTR; (ventromedial) Striatum, vlSTR; (ventrolateral) Striatum, Cl; Claustrum, INS; Insula, Pir; Piriform cortex, S1; Primary somatosensory cortex, M1; Primary motor cortex, NAcc; NAc (core), NAc mSh; NAc (medial shell), NAc vSh; NAc (ventral shell), Sfi; Septofimbrial nucleus, dBNST; (dorsal) Bed nucleus of stria terminalis, vBNST; (ventral) Bed nucleus of stria terminalis, MPO; Medial preopti nucleus, MD; Mediodorsal thalamic nucleus, PVA; (anterior) Paraventricular thalamic nucleus, Re; Reuniens thalamic nucleus, PVN; Paraventricular hypothalamic nucleus, AHC; Anterior hypothalamic area (central), Scn; Suprachiasmatic nucleus, Rt; Reticular nucleus (prethalamus), GP; Globus pallidus, RSG; Retrosplenial granular cortex, dDG; Dorsal Hippocampus (DG), dCA3; Dorsal Hippocampus (CA3), dCA1; Dorsal Hippocampus (CA1), MHb; Medial Habenula, LHb; Lateral Habenula, PV; Paraventricular thalamic nucleus, DM; Dorsomedial hypothalamic nucleus, VMH; Ventromedial hypothalamic nucleus, Arc; Arcuate hypothalamic nucleus, ZI; Zona incerta, LH; Lateral hypothalamus, BLA; Basolateral amygdala, CeA; Central amygdala, BMP; Basomedial amygdaloid nucleus (posterior), Mep; Medial amygdaloid nucleus, Den; Dorsal endopiriform claustrum, vDG; Ventral Hippocampus (DG), vSub; Ventral Hippocampus (Subiculum), Sc; Superior colliculus, PAG; Periaqueductal gray, GV; Geniculate nucleus, VTA; Ventral tegmental area, SN; Substantia nigra, RM; Retromammillary nucleus | | | | | | | | | | |
