# Supplementary material for: Behavioral appraisal by implementing a short sequence of stress resolves adaptively changed stress gains
Source: Research Square preprint supplement (doi:10.21203/rs.3.rs-90131/v1), 2020-10-20
Supplement: Supplementary file 3 [file f9a8221529fc3256c9dbdc84.docx]

**Supplementary Table 2.** A list of the 264 genes that were upregulated or downregulated >1.2-fold in the PL after CRST treatment.

| Probe  Set ID | RefSeq  Transcript ID | Gene  Symbol | Gene function | Fold change of CON vs. CRST | Fold change of CRST vs. CRST+RS5 |
| --- | --- | --- | --- | --- | --- |
| ILMN_2443330 | NM_013697.3 | Ttr | transthyretin | **2.0508** | -1.7414 |
| ILMN_3029489 | NM_001033302.1 | Ciart | circadian associated repressor of transcription | **1.4310** | 1.2191 |
| ILMN_2616226 | NM_016974.1 | Dbp | D site albumin promoter binding protein | **1.4036** | 1.1783 |
| ILMN_2697220 | NM_010216.1 | Figf | vascular endothelial growth factor D | **1.3914** | -1.2719 |
| ILMN_1248947 | NM_010762.4 | Mal | myelin and lymphocyte protein, T cell differentiation protein | **1.3887** | -1.4174 |
| ILMN_2746783 | NM_178086.2 | Fa2h | fatty acid 2-hydroxylase | **1.3510** | -1.5078 |
| ILMN_3024681 | NM_001039365.1 | Mobp | myelin-associated oligodendrocytic basic protein | **1.3329** | -1.3956 |
| ILMN_1225360 | NM_145393.3 | Ythdf2 | YTH domain family 2 | **1.3278** | -1.0297 |
| ILMN_1259536 | NM_010814.2 | Mog | myelin oligodendrocyte glycoprotein | **1.3246** | -1.4749 |
| ILMN_2909782 | NM_025846.1 | Rras2 | related RAS viral (r-ras) oncogene 2 | **1.3220** | -1.2265 |
| ILMN_2873319 | NM_008866.2 | Lypla1 | lysophospholipase 1 | **1.3106** | -1.0731 |
| ILMN_2747196 | NM_007656.4 | Cd82 | CD82 antigen | **1.3071** | -1.0978 |
| ILMN_1237021 | NM_010758.2 | Mag | myelin-associated glycoprotein | **1.3008** | -1.3490 |
| ILMN_2824889 | NM_153520.1 | Opalin | oligodendrocytic myelin paranodal and inner loop protein | **1.2952** | -1.3676 |
| ILMN_1243949 | NM_152915.1 | Dner | delta/notch-like EGF repeat containing | **1.2879** | 1.0315 |
| ILMN_2662264 | NM_029815.1 | Bcas1 | breast carcinoma amplified sequence 1 | **1.2836** | -1.3880 |
| ILMN_2880906 | NM_145978.1 | Pdlim2 | PDZ and LIM domain 2 | **1.2801** | -1.2221 |
| ILMN_3095356 | NM_001025085.1 | Gm5797 | Gm5797; predicted gene 5797 | **1.2794** | -1.2217 |
| ILMN_1213257 | NM_178193.1 | Hist1h4b | histone cluster 1, H4b | **1.2755** | -1.0803 |
| ILMN_3009260 | NM_027978.1 | Coq2 | coenzyme Q2 4-hydroxybenzoate polyprenyltransferase | **1.2687** | -1.1341 |
| ILMN_2484465 | NM_001042523.1 | Txnrd1 | thioredoxin reductase 1 | **1.2650** | -1.1641 |
| ILMN_1243370 | NM_028057.2 | Cyb5r1 | cytochrome b5 reductase 1 | **1.2644** | -1.2661 |
| ILMN_2703138 | NM_172383.2 | Tmem125 | transmembrane protein 125 | **1.2630** | -1.3361 |
| ILMN_2728682 | NM_178774.3 | Prr18 | proline rich 18 | **1.2619** | -1.4026 |
| ILMN_2733330 | NM_016959.2 | Rps3a | ribosomal protein S3A | **1.2613** | -1.1825 |
| ILMN_2756379 | NM_007474.1 | Aqp8 | aquaporin 8 | **1.2611** | 1.1332 |
| ILMN_2671473 | NM_207233.1 | C1ql2 | complement component 1, q subcomponent-like 2 | **1.2601** | 1.5648 |
| ILMN_1241786 | NM_146708.1 | Olfr402 | olfactory receptor 402 | **1.2596** | -1.0774 |
| ILMN_2983641 | NM_194343.1 | Trim45 | tripartite motif-containing 45 | **1.2595** | -1.1857 |
| ILMN_3107322 | NM_009572.3 | Zhx1 | zinc fingers and homeoboxes 1 | **1.2592** | -1.1497 |
| ILMN_2737200 | NM_010777.3 | Mbp | myelin basic protein | **1.2579** | -1.3325 |
| ILMN_2732601 | NM_028710.2 | Arsg | arylsulfatase G | **1.2568** | -1.2695 |
| ILMN_2595597 | NM_028390.2 | Anln | anillin, actin binding protein | **1.2537** | -1.6246 |
| ILMN_1217225 | NM_025911.2 | Ccdc91 | coiled-coil domain containing 91 | **1.2467** | -1.3242 |
| ILMN_2936936 | NM_027156.2 | Ddx51 | DEAD (Asp-Glu-Ala-Asp) box polypeptide 51 | **1.2454** | -1.0272 |
| ILMN_2919882 | NM_001033433.1 | Tmem102 | transmembrane protein 102 | **1.2447** | -1.1392 |
| ILMN_1218310 | NM_011081.2 | Piga | phosphatidylinositol glycan anchor biosynthesis, class A | **1.2443** | -1.1255 |
| ILMN_2798340 | NM_144794.1 | Tmem63a | transmembrane protein 63a | **1.2440** | -1.1584 |
| ILMN_2807757 | NM_199446.1 | Phkb | phosphorylase kinase beta | **1.2410** | -1.0302 |
| ILMN_2631192 | NM_178027.3 | Vps26b | VPS26 retromer complex component B | **1.2409** | -1.0709 |
| ILMN_2616214 | NM_146276.1 | Olfr1394 | olfactory receptor 1394 | **1.2400** | -1.2403 |
| ILMN_1246502 | NM_173386.3 | Mb21d1 | Mab-21 domain containing 1 | **1.2395** | -1.1899 |
| ILMN_3090581 | NM_019584.2 | Becn1 | beclin 1, autophagy related | **1.2380** | -1.0952 |
| ILMN_2645020 | NM_028672 | Fam161a | family with sequence similarity 161, member A | **1.2379** | -1.1326 |
| ILMN_2597606 | NM_175452.3 | Gjc2 | gap junction protein, gamma 2 | **1.2379** | -1.4301 |
| ILMN_2670352 | NM_029814.1 | Chmp5 | charged multivesicular body protein 5 | **1.2347** | -1.0480 |
| ILMN_2764250 | NM_029779.1 | Ccdc116 | coiled-coil domain containing 116 | **1.2341** | -1.1023 |
| ILMN_2758545 | NM_027998.3 | Cldn23 | claudin 23 | **1.2340** | -1.2548 |
| ILMN_1248854 | NM_019987.1 | Ick | intestinal cell kinase | **1.2334** | -1.0100 |
| ILMN_1231794 | NM_011857.2 | Tenm3 | teneurin transmembrane protein 3 | **1.2333** | -1.2363 |
| ILMN_1232489 | NM_028339.1 | Txndc1 | thioredoxin-related transmembrane protein 1 | **1.2328** | -1.0287 |
| ILMN_1240381 | NM_011123.2 | Plp1 | proteolipid protein (myelin) 1 | **1.2326** | -1.1869 |
| ILMN_2605890 | NM_009387.1 | Tk1 | thymidine kinase 1 | **1.2323** | -1.1013 |
| ILMN_2828009 | NM_019956.1 | Krt71 | keratin 71 | **1.2322** | -1.1062 |
| ILMN_1234698 | NM_027533.2 | Tspan2 | tetraspanin 2 | **1.2321** | -1.5174 |
| ILMN_2802263 | NM_009923.1 | Cnp | 2',3'-cyclic nucleotide 3' phosphodiesterase | **1.2304** | -1.2264 |
| ILMN_2607253 | NM_011029.3 | Rpsa | ribosomal protein SA | **1.2301** | -1.2295 |
| ILMN_1239557 | NM_011674.4 | Ugt8a | UDP galactosyltransferase 8A | **1.2296** | -1.5102 |
| ILMN_1246139 | NM_008770.2 | Cldn11 | claudin 11 | **1.2289** | -1.3331 |
| ILMN_2453565 | NM_026112.3 | Zfp606 | zinc finger protein 606 | **1.2282** | -1.2148 |
| ILMN_2987863 | NM_011066.1 | Per2 | period circadian clock 2 | **1.2274** | 1.1500 |
| ILMN_2734368 | NM_028369.1 | Mon1a | MON1 homolog A, secretory traffciking associated | **1.2272** | -1.0352 |
| ILMN_3001013 | NM_001009575.2 | Armcx5 | armadillo repeat containing, X-linked 5 [Mus musculus | **1.2269** | -1.2000 |
| ILMN_2491859 | NM_053273.1 | Ttyh2 | tweety family member 2 | **1.2267** | -1.2280 |
| ILMN_1252953 | NM_019626.3 | Cbln1 | cerebellin 1 precursor protein | **1.2265** | -1.3041 |
| ILMN_2682321 | NM_133972.2 | Armc6 | armadillo repeat containing 6 | **1.2253** | -1.1601 |
| ILMN_2827081 | NM_013731.1 | Sgk2 | serum/glucocorticoid regulated kinase 2 | **1.2248** | -1.1809 |
| ILMN_2720976 | NM_011348.2 | Sema3e | sema domain, immunoglobulin domain (Ig), short basic domain, secreted, (semaphorin) 3E | **1.2246** | -1.3601 |
| ILMN_1244187 | NM_027168.2 | Hddc2 | HD domain containing 2 | **1.2245** | -1.0341 |
| ILMN_1239181 | NM_026393.1 | Nmral1 | NmrA-like family domain containing 1 | **1.2236** | -1.1946 |
| ILMN_1256702 | NM_009112.2 | S100a10 | S100 calcium binding protein A10 (calpactin) | **1.2236** | -1.1920 |
| ILMN_3162081 | NM_031392.2 | Wdr6 | WD repeat domain 6 | **1.2231** | -1.0717 |
| ILMN_3060168 | NM_134126.2 | Ift140 | intraflagellar transport 140 | **1.2227** | -1.0213 |
| ILMN_2417813 | NM_009449.3 | Tuba3b | tubulin, alpha 3B | **1.2224** | 1.0083 |
| ILMN_1258914 | NM_175328.2 | Slc6a15 | solute carrier family 6 (neurotransmitter transporter), member 15 | **1.2203** | -1.1985 |
| ILMN_2732145 | NM_012049.1 | Nit1 | nitrilase 1 | **1.2194** | -1.1354 |
| ILMN_3123063 | NM_013732.4 | Cartpt | CART prepropeptide | **1.2188** | 1.3902 |
| ILMN_2891176 | NM_008618.2 | Mdh1 | malate dehydrogenase 1, NAD (soluble) | **1.2186** | -1.2206 |
| ILMN_1239002 | NM_013625.2 | Pafah1b1 | platelet-activating factor acetylhydrolase, isoform 1b, subunit 1 | **1.2183** | -1.2307 |
| ILMN_2844376 | NM_173751.3 | Ilvbl | ilvB (bacterial acetolactate synthase)-like | **1.2180** | -1.1791 |
| ILMN_2816356 | NM_023507.3 | Ercc6l2 | excision repair cross-complementing rodent repair deficiency, complementation group 6 like 2 | **1.2180** | -1.0882 |
| ILMN_1217822 | NM_133722.1 | Abhd17c | abhydrolase domain containing 17C | **1.2179** | -1.0282 |
| ILMN_2659574 | NM_031406.2 | Slc12a9 | solute carrier family 12 (potassium/chloride transporters), member 9 | **1.2179** | -1.1540 |
| ILMN_2485323 | NM_133977.2 | Trf | transferrin | **1.2178** | -1.4769 |
| ILMN_2886207 | NM_172461.1 | Nek11 | NIMA (never in mitosis gene a)-related expressed kinase 11 | **1.2171** | -1.0705 |
| ILMN_2656211 | NM_199013.2 | Irgc1 | immunity-related GTPase family, cinema 1 | **1.2165** | -1.0893 |
| ILMN_1232368 | NM_183035.1 | Defb34 | defensin beta 34 | **1.2163** | -1.0977 |
| ILMN_1232383 | NM_001043228.1 | Dntt | deoxynucleotidyltransferase, terminal | **1.2160** | -1.1332 |
| ILMN_2445926 | NM_001033209.2 | Xylb | xylulokinase homolog (H. influenzae) | **1.2159** | -1.1021 |
| ILMN_1230413 | NM_017382.4 | Rab11a | RAB11A, member RAS oncogene family | **1.2155** | -1.2863 |
| ILMN_2440242 | NM_009575.2 | Zic3 | zinc finger protein of the cerebellum 3 | **1.2153** | -1.0334 |
| ILMN_1253062 | NM_173767.2 | Insc | INSC spindle orientation adaptor protein | **1.2150** | -1.2680 |
| ILMN_2752497 | NM_026746.2 | Nsmce2 | NSE2/MMS21 homolog, SMC5-SMC6 complex SUMO ligase | **1.2146** | 1.0159 |
| ILMN_2933022 | NM_013746.1 | Plekhb1 | pleckstrin homology domain containing, family B (evectins) member 1 | **1.2144** | -1.2764 |
| ILMN_2762026 | NM_011045.2 | Pcna | proliferating cell nuclear antigen | **1.2141** | -1.0287 |
| ILMN_2477702 | NM_026057.2 | Zfp422 | zinc finger protein 422 | **1.2135** | -1.0725 |
| ILMN_1255021 | NM_007852.1 | Defcr6 | defensin, alpha, 6 | **1.2135** | -1.1167 |
| ILMN_2688383 | NM_138747.1 | Nol1 | NO synthase-like protein | **1.2135** | -1.2271 |
| ILMN_1233363 | NM_153126.2 | Nat10 | N-acetyltransferase 10 | **1.2125** | -1.1345 |
| ILMN_1232213 | NM_015748.2 | Slit1 | slit guidance ligand 1 | **1.2121** | -1.0390 |
| ILMN_1215808 | NM_146953.1 | Olfr531 | olfactory receptor 531 | **1.2120** | -1.1650 |
| ILMN_2637897 | NM_178420.2 | Nlrx1 | NLR family member X | **1.2117** | -1.0257 |
| ILMN_2655555 | NM_027139.3 | Taf9 | TATA-box binding protein associated factor 9 | **1.2109** | -1.1371 |
| ILMN_1260033 | NM_026160.3 | Map1lc3b | microtubule-associated protein 1 light chain 3 beta | **1.2107** | 1.0964 |
| ILMN_2812700 | NM_146764.1 | Olfr1408 | olfactory receptor 1408 | **1.2107** | -1.0909 |
| ILMN_1245335 | NM_176995.2 | Neurl1b | neuralized E3 ubiquitin protein ligase 1B | **1.2105** | -1.0601 |
| ILMN_2595612 | NM_173011.1 | Idh2 | isocitrate dehydrogenase 2 (NADP+), mitochondrial | **1.2096** | 1.0612 |
| ILMN_1224336 | NM_029035.2 | Spsb1 | splA/ryanodine receptor domain and SOCS box containing 1 | **1.2093** | -1.2072 |
| ILMN_1217043 | XM_001478835.1 | LOC100047762 | similar to Aspartate aminotransferase, cytoplasmic (Transaminase A) | **1.2088** | -1.1151 |
| ILMN_2596998 | NM_027990.3 | Lypd6b | LY6/PLAUR domain containing 6B | **1.2085** | -1.2263 |
| ILMN_2646166 | NM_008681 | Ndrl | N-myc downstream regulated-like | **1.2074** | -1.1345 |
| ILMN_2749669 | NM_145434.3 | Nr1d1 | nuclear receptor subfamily 1, group D, member 1 | **1.2068** | 1.0259 |
| ILMN_1256281 | NM_025332.2 | Gtpbp8 | GTP-binding protein 8 (putative) | **1.2067** | -1.2203 |
| ILMN_2669869 | NM_011699.3 | Lin7c | lin-7 homolog C (C. elegans) | **1.2054** | -1.1458 |
| ILMN_2628848 | NM_021511.1 | Rrs1 | ribosome biogenesis regulator 1 | **1.2054** | -1.1426 |
| ILMN_3158937 | NM_001081161.1 | Fam171a1 | family with sequence similarity 171, member A1 | **1.2054** | -1.0693 |
| ILMN_2589403 | NM_008721.3 | Npdc1 | neural proliferation, differentiation and control 1 | **1.2050** | -1.1338 |
| ILMN_2861787 | NM_029478.2 | Tmem49 | vacuole membrane protein 1 | **1.2047** | -1.1736 |
| ILMN_2907241 | NM_001033334.1 | Tmem90a | synapse differentiation inducing 1 like | **1.2040** | -1.0763 |
| ILMN_2731407 | NM_008108.4 | Gdf3 | growth differentiation factor 3 | **1.2039** | -1.1583 |
| ILMN_2521340 | NM_013696.2 | Trhr | thyrotropin releasing hormone receptor | **1.2033** | -1.3039 |
| ILMN_1222794 | NM_175134.3 | Ankrd46 | ankyrin repeat domain 46 | **1.2019** | -1.1567 |
| ILMN_2770183 | NM_016765.2 | Ddah2 | dimethylarginine dimethylaminohydrolase 2 | **1.2016** | -1.0087 |
| ILMN_2733698 | NM_009945.3 | Cox7a2 | cytochrome c oxidase subunit VIIa 2 | **1.2003** | -1.0512 |
| ILMN_1259048 | NM_027315.3 | Ube2q1 | ubiquitin-conjugating enzyme E2Q family member 1 | **1.2002** | -1.0008 |
| ILMN_3162347 | NM_053015.2 | Mlph | melanophilin | **-1.2003** | 1.0520 |
| ILMN_2684693 | NM_028207.2 | Dusp3 | dual specificity phosphatase 3 (vaccinia virus phosphatase VH1-related) | **-1.2004** | 1.0706 |
| ILMN_1255871 | NM_010729.2 | Loxl1 | lysyl oxidase-like 1 | **-1.2008** | 1.4191 |
| ILMN_2891065 | NM_146698.2 | Olfr1443 | olfactory receptor 1443 | **-1.2014** | 1.1932 |
| ILMN_2684289 | NM_009152.2 | Sema3a | sema domain, immunoglobulin domain (Ig), short basic domain, secreted, (semaphorin) 3A | **-1.2018** | 1.0924 |
| ILMN_2925711 | NM_026268.1 | Dusp6 | dual specificity phosphatase 6 | **-1.2022** | 1.0250 |
| ILMN_2757688 | NM_181317.3 | Kcns2 | K+ voltage-gated channel, subfamily S, 2 | **-1.2022** | 1.0615 |
| ILMN_2819679 | NM_027935.2 | Tmem50a | transmembrane protein 50A | **-1.2022** | 1.2179 |
| ILMN_1225423 | NM_177822.3 | Mslnl | mesothelin-like | **-1.2023** | 1.6898 |
| ILMN_3055567 | NM_001034898.1 | Ms4a15 | membrane-spanning 4-domains, subfamily A, member 15 | **-1.2024** | 1.1426 |
| ILMN_2799351 | NM_025590.3 | Acot11 | acyl-CoA thioesterase 11 | **-1.2028** | 1.1119 |
| ILMN_1222814 | NM_146481.2 | Olfr890 | olfactory receptor 890 | **-1.2038** | 1.1129 |
| ILMN_2654822 | NM_145979.2 | Chd4 | chromodomain helicase DNA binding protein | **-1.2042** | 1.0886 |
| ILMN_2614777 | NM_011161.4 | Mapk11 | mitogen-activated protein kinase 11 | **-1.2047** | -1.0153 |
| ILMN_2962041 | NM_175417.2 | Adtrp | androgen dependent TFPI regulating protein | **-1.2047** | 1.0576 |
| ILMN_1256423 | NM_198024.1 | Ranbp3l | RAN binding protein 3-like | **-1.2053** | 1.7819 |
| ILMN_2760806 | NM_133729.1 | Stk26 | serine/threonine kinase 26 | **-1.2053** | 1.1105 |
| ILMN_2503052 | NM_009393.2 | Tnnc1 | troponin C, cardiac/slow skeletal | **-1.2055** | 1.4627 |
| ILMN_1244797 | NM_144553.1 | Dlgap5 | DLG associated protein 5 | **-1.2056** | 1.0837 |
| ILMN_2695819 | NM_030143.3 | Ddit4l | DNA-damage-inducible transcript 4-like | **-1.2059** | 1.1986 |
| ILMN_1224884 | NM_009788.4 | Calb1 | calbindin 1 | **-1.2060** | 1.0896 |
| ILMN_2676243 | NM_178194.3 | Hist1h2be | histone cluster 1, H2be | **-1.2062** | -1.0354 |
| ILMN_2822643 | NM_009474.3 | Uox | urate oxidase | **-1.2062** | 1.0279 |
| ILMN_2430813 | NM_026131 | Pdlim7 | PDZ and LIM domain | **-1.2070** | 1.2408 |
| ILMN_1229763 | NM_172899.3 | Dmkn | dermokine | **-1.2073** | 1.0157 |
| ILMN_2599955 | NM_145534.1 | Btbd3 | BTB (POZ) domain containing 3 | **-1.2074** | 1.2409 |
| ILMN_1246153 | NM_133362.2 | Erdr1 | erythroid differentiation regulator 1 | **-1.2078** | 1.1715 |
| ILMN_2422743 | NM_023141 | Tor3a | torsin family 3, member A | **-1.2082** | 1.1926 |
| ILMN_1247691 | NM_008235.2 | Hes1 | hes family bHLH transcription factor 1 | **-1.2087** | 1.1824 |
| ILMN_3124491 | NM_183354.2 | Slc12a1 | solute carrier family 12, member 1 | **-1.2089** | 1.1612 |
| ILMN_3141648 | NM_175441.3 | Mylk3 | myosin light chain kinase 3 | **-1.2099** | 1.0140 |
| ILMN_1219362 | NM_147045.1 | Olfr683 | olfactory receptor 683 | **-1.2109** | 1.0532 |
| ILMN_3146952 | NM_001009979.1 | Pde1a | phosphodiesterase 1A, calmodulin-dependent | **-1.2110** | 1.0256 |
| ILMN_2728967 | NM_029441.2 | Cdyl2 | chromodomain protein, Y chromosome-like 2 | **-1.2113** | 1.0948 |
| ILMN_1246130 | NM_007708.3 | Cit | citron | **-1.2118** | 1.0723 |
| ILMN_3161954 | XM_001476591.1 | LOC100047018 | olfactory receptor Olfr688 | **-1.2120** | 1.0865 |
| ILMN_2914453 | NM_144920.3 | Plekha5 | pleckstrin homology domain containing, family A member 5 | **-1.2121** | 1.1446 |
| ILMN_3001341 | NM_031396.1 | Cnnm1 | cyclin M1 | **-1.2127** | 1.1783 |
| ILMN_2826671 | NM_010141.2 | Epha7 | Eph receptor A7 | **-1.2132** | -1.0657 |
| ILMN_1228590 | NM_025671.2 | Ogfod2 | 2-oxoglutarate and iron-dependent oxygenase domain containing 2 | **-1.2138** | 1.0424 |
| ILMN_2606667 | NM_007841.3 | Ddx6 | DEAD (Asp-Glu-Ala-Asp) box polypeptide 6 | **-1.2142** | 1.2206 |
| ILMN_3156010 | NM_018884.1 | Pdzrn3 | PDZ domain containing RING finger 3 | **-1.2145** | 1.1404 |
| ILMN_2924216 | NM_172134.1 | Pdxk | pyridoxal (pyridoxine, vitamin B6) kinase | **-1.2146** | 1.0072 |
| ILMN_3038944 | NM_001036684.1 | Atp2b2 | ATPase, Ca++ transporting, plasma membrane 2 | **-1.2148** | 1.0169 |
| ILMN_2653328 | NM_174851.2 | Il28ra | interleukin 28 receptor, alpha (interferon, lambda receptor) | **-1.2151** | 1.1634 |
| ILMN_1248028 | NM_010129.1 | Emp3 | epithelial membrane protein 3 | **-1.2156** | 1.5315 |
| ILMN_2708928 | NM_175177.3 | Bdh1 | 3-hydroxybutyrate dehydrogenase, type 1 | **-1.2160** | 1.2210 |
| ILMN_1249142 | XM_001476801.1 | LOC100046781 | carboxypeptidase D | **-1.2169** | 1.0743 |
| ILMN_2833163 | NM_173375.1 | Fam180a | family with sequence similarity 180, member A | **-1.2179** | 1.6391 |
| ILMN_1246118 | NM_053167.2 | Trim9 | tripartite motif-containing 9 | **-1.2181** | 1.1886 |
| ILMN_2457054 | NM_011677.2 | Ung | uracil DNA glycosylase | **-1.2183** | 1.1197 |
| ILMN_2620406 | NM_016789.2 | Nptx2 | neuronal pentraxin 2 | **-1.2193** | 1.0147 |
| ILMN_2652875 | NM_013517.1 | Fcer2a | Fc receptor, IgE, low affinity II, alpha polypeptide | **-1.2197** | 1.0639 |
| ILMN_3049094 | NM_053260.2 | Prss29 | protease, serine 29 | **-1.2200** | 1.1152 |
| ILMN_2982143 | NM_001033222.1 | Pdzd8 | PDZ domain containing 8 | **-1.2200** | 1.0831 |
| ILMN_2708133 | NM_201411.1 | Flrt1 | fibronectin leucine rich transmembrane protein 1 | **-1.2202** | 1.0590 |
| ILMN_2804166 | NM_033608.2 | Igsf9 | immunoglobulin superfamily, member 9 | **-1.2205** | 1.0655 |
| ILMN_2913406 | NR_002868.1 | Gm5476 | predicted gene 5476 | **-1.2206** | 1.0407 |
| ILMN_2970744 | NM_178414.2 | Acsm4 | acyl-CoA synthetase medium-chain family member 4 | **-1.2210** | 1.4963 |
| ILMN_2777471 | NM_010398.1 | H2-T23 | histocompatibility 2, T region locus 23 | **-1.2214** | -1.0035 |
| ILMN_2721016 | NM_022984.3 | Retn | resistin | **-1.2215** | 1.0887 |
| ILMN_1233371 | NM_025696 | Sorcs3 | sortilin-related VPS10 domain containing receptor 3 | **-1.2216** | 1.0504 |
| ILMN_2492264 | NM_018865.2 | Wisp1 | WNT1 inducible signaling pathway protein 1 | **-1.2222** | 1.2352 |
| ILMN_3070466 | NM_011794.3 | Bpnt1 | bisphosphate 3'-nucleotidase 1 | **-1.2223** | 1.0169 |
| ILMN_2632462 | NM_009772.1 | Bub1 | BUB1, mitotic checkpoint serine/threonine kinase | **-1.2228** | 1.0339 |
| ILMN_2800813 | NM_023341.2 | Cabc1 | chaperone, ABC1 activity of bc1 complex like (S. pombe) | **-1.2238** | 1.1132 |
| ILMN_1217969 | NM_026730.1 | Gpihbp1 | GPI-anchored HDL-binding protein 1 | **-1.2249** | -1.0162 |
| ILMN_2601471 | NM_007631.1 | Ccnd1 | cyclin D1 | **-1.2258** | 1.1380 |
| ILMN_2747598 | NM_029947.2 | Gm34285 | RIKEN cDNA A730035I17 gene | **-1.2270** | 1.1629 |
| ILMN_2687473 | NM_144946.3 | Neto1 | neuropilin (NRP) and tolloid (TLL)-like 1 | **-1.2283** | 1.0121 |
| ILMN_2691286 | NM_026046.3 | Zfp329 | zinc finger protein 329 | **-1.2284** | 1.1056 |
| ILMN_2692868 | NM_026141.2 | Ppil4 | peptidylprolyl isomerase (cyclophilin)-like 4 | **-1.2296** | 1.1189 |
| ILMN_1229726 | NM_178887.3 | Fibcd1 | fibrinogen C domain containing 1 | **-1.2296** | 1.3820 |
| ILMN_1228336 | NM_175344.3 | Ano6 | anoctamin 6 | **-1.2302** | 1.1901 |
| ILMN_2624854 | NM_008183.3 | Gstm2 | glutathione S-transferase, mu 2 | **-1.2303** | 2.0924 |
| ILMN_2626114 | NM_001003950.2 | Rab3ip | RAB3A interacting protein | **-1.2305** | 1.1481 |
| ILMN_2497067 | NM_144516.1 | Zmynd11 | zinc finger, MYND domain containing 11 | **-1.2309** | 1.0508 |
| ILMN_2862026 | NM_001033185.1 | Ccdc190 | coiled-coil domain containing 190 | **-1.2318** | 1.0735 |
| ILMN_3162060 | NM_001025382.1 | Fam196b | family with sequence similarity 196, member B | **-1.2322** | 1.1671 |
| ILMN_2792028 | NM_145451.1 | Gpx6 | glutathione peroxidase 6 | **-1.2330** | 1.6249 |
| ILMN_2655058 | NM_177059.3 | Fstl4 | follistatin-like 4 | **-1.2333** | 1.1542 |
| ILMN_1213978 | NM_011216.2 | Ptpro | protein tyrosine phosphatase, receptor type, O | **-1.2340** | 1.2822 |
| ILMN_2635462 | NM_011339.2 | Cxcl15 | chemokine (C-X-C motif) ligand 15 | **-1.2373** | 1.1188 |
| ILMN_2873822 | NM_009636.1 | Aebp1 | AE binding protein 1 | **-1.2382** | 2.1741 |
| ILMN_2634083 | NM_007669.3 | Cdkn1a | cyclin-dependent kinase inhibitor 1A (P21) | **-1.2384** | 1.0471 |
| ILMN_1220617 | NM_021877.2 | Hr | hairless | **-1.2389** | -1.0296 |
| ILMN_2826414 | NM_172882.2 | Wdfy3 | WD repeat and FYVE domain containing 3 | **-1.2398** | 0.0426 |
| ILMN_2982636 | NM_020021.2 | Mos | Moloney sarcoma oncogene | **-1.2409** | 1.0120 |
| ILMN_1240726 | NM_008608.2 | Mmp14 | matrix metallopeptidase 14 (membrane-inserted) | **-1.2415** | 1.2289 |
| ILMN_2837396 | NM_001005788.2 | Zfp69 | zinc finger protein 69 [Mus musculus | **-1.2426** | 1.1675 |
| ILMN_1257855 | NM_199018.1 | Stard8 | START domain containing 8 | **-1.2436** | 1.2773 |
| ILMN_2657682 | XM_131083.2 | Dennd2d | DENN/MADD domain containing 2D | **-1.2444** | 1.1250 |
| ILMN_1231586 | NM_021372.2 | Sertad2 | SERTA domain containing 2 | **-1.2468** | 1.1851 |
| ILMN_2623983 | NM_010118.1 | Egr2 | early growth response 2 | **-1.2471** | -1.0452 |
| ILMN_2666136 | NM_174988.2 | Cdh22 | cadherin 22 | **-1.2502** | 1.2890 |
| ILMN_2959757 | NM_013809.1 | Cyp2g1 | cytochrome P450, family 2, subfamily g, polypeptide 1 | **-1.2505** | 2.6685 |
| ILMN_1230880 | NM_017479 | Myst4 | K(lysine) acetyltransferase 6B | **-1.2505** | 1.0224 |
| ILMN_2708491 | NM_008766.2 | Slc22a6 | solute carrier family 22 (organic anion transporter), member 6 | **-1.2507** | 2.3301 |
| ILMN_2481391 | NM_018759.1 | Zfp326 | zinc finger protein 326 | **-1.2511** | -1.0106 |
| ILMN_1237921 | NM_172426.2 | Slc24a2 | solute carrier family 24 (sodium/potassium/calcium exchanger), member 2 | **-1.2541** | 1.2120 |
| ILMN_2913166 | NM_009776.1 | Serping1 | serine (or cysteine) peptidase inhibitor, clade G, member 1 | **-1.2547** | 1.9639 |
| ILMN_1236788 | NM_008342.2 | Igfbp2 | insulin-like growth factor binding protein 2 | **-1.2549** | 1.3172 |
| ILMN_2868220 | NM_008380.1 | Inhba | inhibin beta-A | **-1.2630** | 1.0444 |
| ILMN_2482427 | NM_011743.2 | Zfp106 | zinc finger protein 106 | **-1.2662** | 1.1619 |
| ILMN_1258601 | NM_018871.2 | Ywhag | tyrosine 3-monooxygenase/tryptophan 5-monooxygenase activation protein, gamma polypeptide | **-1.2667** | 1.1561 |
| ILMN_2748222 | NM_021344.2 | Tesc | tescalcin | **-1.2670** | 1.2451 |
| ILMN_2754787 | NM_025822.3 | Rsrc1 | arginine/serine-rich coiled-coil 1 | **-1.2677** | 1.1579 |
| ILMN_2908122 | NM_011409.1 | Slfn3 | schlafen 3 | **-1.2684** | 1.1482 |
| ILMN_1251414 | NM_153553.3 | Npas4 | neuronal PAS domain protein 4 | **-1.2693** | -1.1485 |
| ILMN_1250766 | NM_021495.2 | Pvrl3 | poliovirus receptor-related 3 | **-1.2694** | 1.2257 |
| ILMN_2668462 | NM_133918.1 | Emilin1 | elastin microfibril interfacer 1 | **-1.2763** | 1.1219 |
| ILMN_2827729 | NM_007586.1 | Calb2 | calbindin 2 | **-1.2777** | 1.6050 |
| ILMN_2639849 | NM_175631.3 | Cbln4 | cerebellin 4 precursor protein | **-1.2787** | 1.0491 |
| ILMN_2800732 | NM_144785.1 | Slc22a9 | solute carrier family 22 member 9 | **-1.2794** | 1.0619 |
| ILMN_1232884 | NM_011451.2 | Sphk1 | sphingosine kinase 1 | **-1.2824** | 3.9293 |
| ILMN_2622983 | NM_013642.2 | Dusp1 | dual specificity phosphatase 1 | **-1.2873** | -1.1948 |
| ILMN_2747959 | NM_007833.4 | Dcn | decorin | **-1.2893** | 2.5696 |
| ILMN_1227352 | NM_175506.3 | Adamts19 | a disintegrin-like and metallopeptidase (reprolysin type) with thrombospondin type 1 motif, 19 | **-1.2895** | 1.2721 |
| ILMN_1226525 | NM_207105.2 | H2-Ab1 | histocompatibility 2, class II antigen A, beta 1 | **-1.2936** | 1.8465 |
| ILMN_1238436 | NM_009946.2 | Cplx2 | complexin 2 | **-1.2940** | 1.1818 |
| ILMN_1213736 | NM_027519.3 | Medag | mesenteric estrogen dependent adipogenesis | **-1.3027** | 1.2238 |
| ILMN_2595732 | XM_001475817.1 | LOC100046232 | NFIL3/E4BP4 transcription factor | **-1.3145** | -1.1178 |
| ILMN_2666018 | NM_008597.3 | Mgp | matrix Gla protein | **-1.3150** | 2.4321 |
| ILMN_2687872 | NM_007742.2 | Col1a1 | collagen, type I, alpha 1 | **-1.3175** | 2.4526 |
| ILMN_2704570 | NM_016743.2 | Nell2 | NEL-like 2 | **-1.3242** | 0.3833 |
| ILMN_1212645 | NM_144512.2 | Slc6a13 | solute carrier family 6 (neurotransmitter transporter, GABA), member 13 | **-1.3261** | 1.8033 |
| ILMN_2849016 | NM_026183.2 | Slc47a1 | solute carrier family 47, member 1 | **-1.3312** | 3.7652 |
| ILMN_2597769 | NM_010514.2 | Igf2 | insulin-like growth factor 2 | **-1.3438** | 2.2442 |
| ILMN_2750515 | NM_010234.2 | Fos | FBJ osteosarcoma oncogene | **-1.3532** | -1.3697 |
| ILMN_2755815 | NM_022723.2 | Scube1 | signal peptide, CUB domain, EGF-like 1 | **-1.3553** | 1.1483 |
| ILMN_2693895 | NM_007392.2 | Acta2 | actin, alpha 2, smooth muscle, aorta | **-1.3702** | 2.2383 |
| ILMN_2827072 | NM_172892.1 | Slc13a4 | solute carrier family 13 (sodium/sulfate symporters), member 4 | **-1.3807** | 3.0022 |
| ILMN_2749169 | NM_011312.2 | S100a5 | S100 calcium binding protein A5 | **-1.4034** | 2.5856 |
| ILMN_2859613 | NM_008760.2 | Ogn | osteoglycin | **-1.4163** | 3.0301 |
| ILMN_3117602 | NM_009852.3 | Cd6 | CD6 antigen | **-1.4222** | 1.2611 |
| ILMN_2980815 | NM_130878.2 | Pcdh21 | cadherin-related family member 1 | **-1.5224** | 1.9094 |
| ILMN_1248316 | NM_008963.1 | Ptgds | prostaglandin D2 synthase | **-1.5224** | 2.9639 |
| ILMN_2609052 | NM_026556.3 | Dynll2 | dynein light chain LC8-type 2 | **-1.5338** | -1.4263 |
| ILMN_2597827 | NM_018790.2 | Arc | activity regulated cytoskeletal-associated protein | **-1.7343** | -1.1662 |
